# Supplementary material for: Traceless reductive ligation at a tryptophan site: a facile access to β-hydroxytryptophan appended peptides
Source: Royal Society of Chemistry journal article supplement (doi:10.1039/c6ob01542e), 2016-01-01

## Supporting Information

### **Traceless Reductive Ligation at Tryptophan Site: a Facile Access to $\beta$ -Hydroxytryptophan appended Peptides**

Kiran Bajaj,<sup>a,\*</sup> Rajeev Sakhuja,<sup>a</sup> Girinath G. Pillai<sup>b</sup>

<sup>a</sup>*Department of Chemistry, Birla Institute of Technology and Science, Pilani 333031, Rajasthan, India*

<sup>b</sup>*Institute of Chemistry, University of Tartu, Tartu 50411, Estonia*

*E-mail: kbajaj26@gmail.com*

#### **Table of Contents**

- 1. General procedure for the synthesis of 1a.**
- 2. Spectral data 3a-k and 4a-k**

General synthesis of compound **1a**: Compound **1a** was synthesized by the literature method. (Scheme 1)

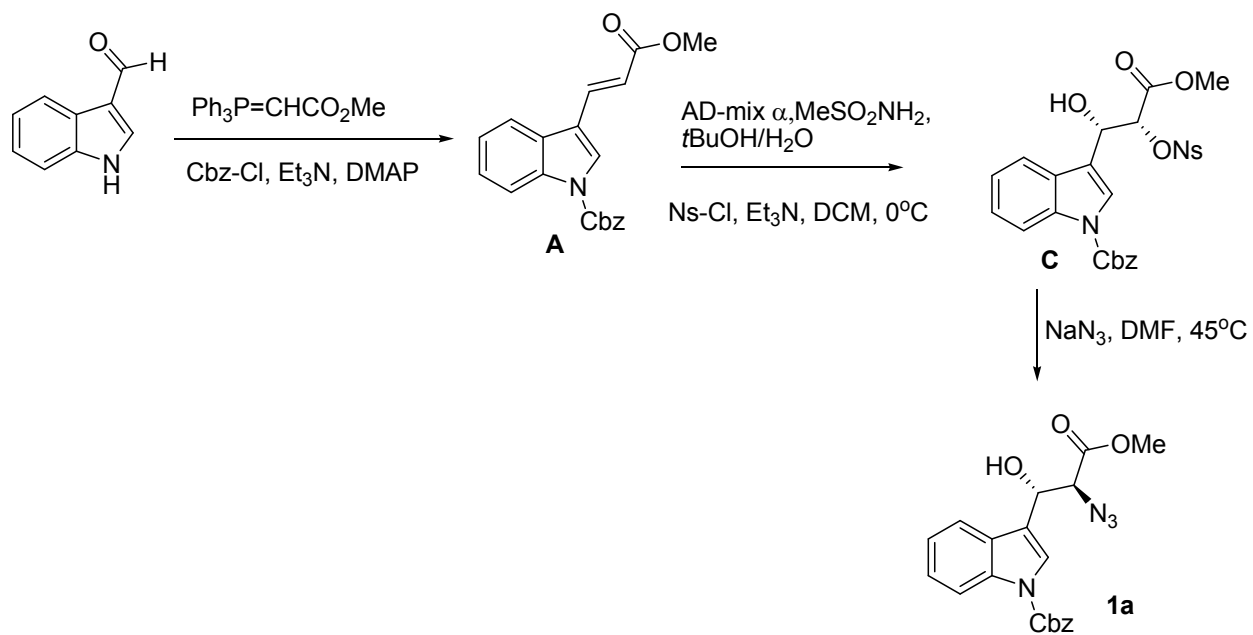

Scheme 1. Synthesis of functionalized tryptophan precursor **1a**.

$^1\text{H}$  NMR (400 MHz,  $\text{CDCl}_3$ ) and  $^{13}\text{C}$  NMR (100 MHz,  $\text{CDCl}_3$ ) of compound A

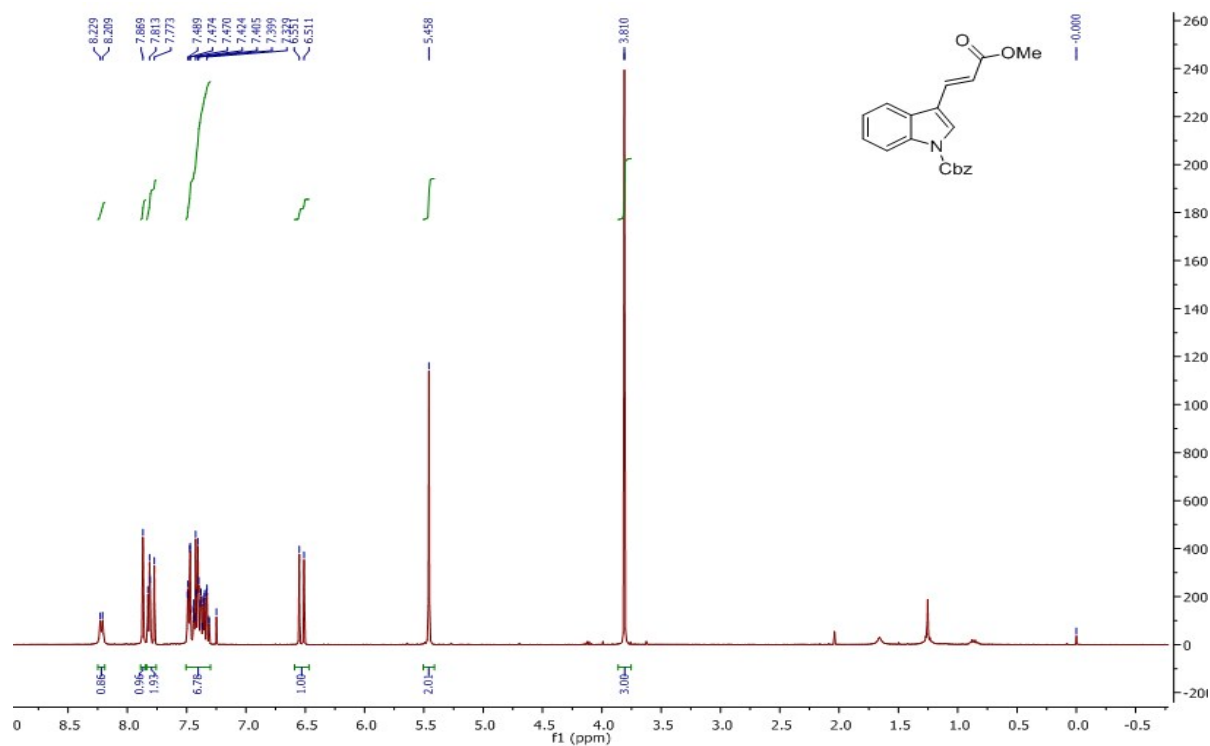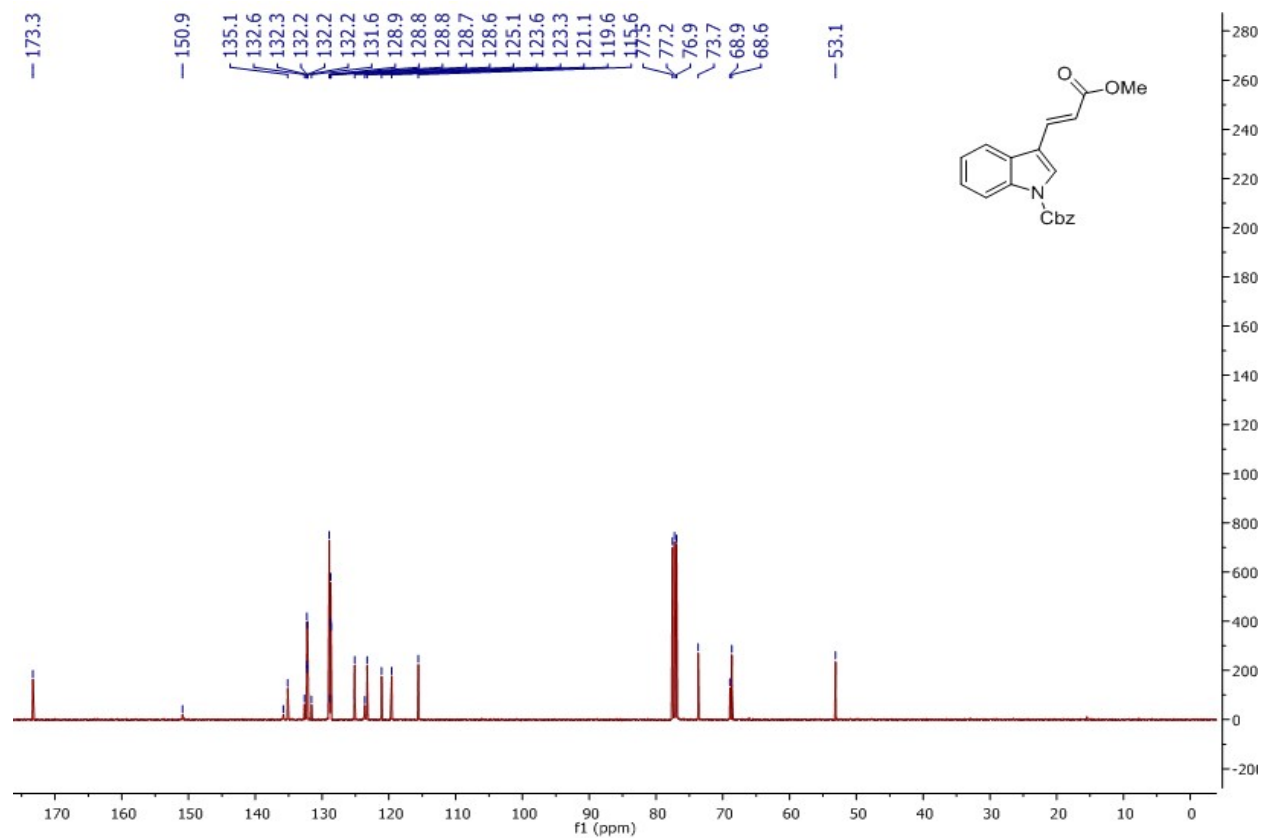

$^1\text{H}$  NMR (400 MHz,  $\text{CDCl}_3$ ) and  $^{13}\text{C}$  NMR (100 MHz,  $\text{CDCl}_3$ ) of compound B

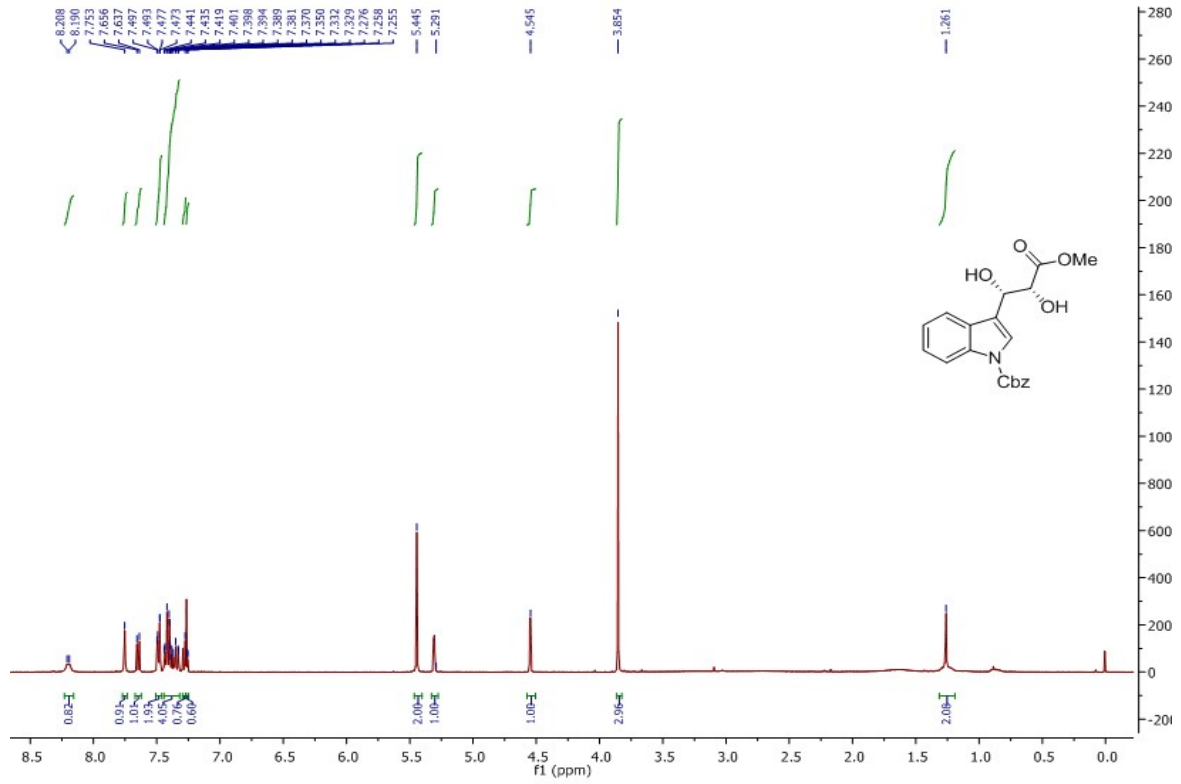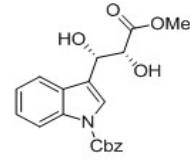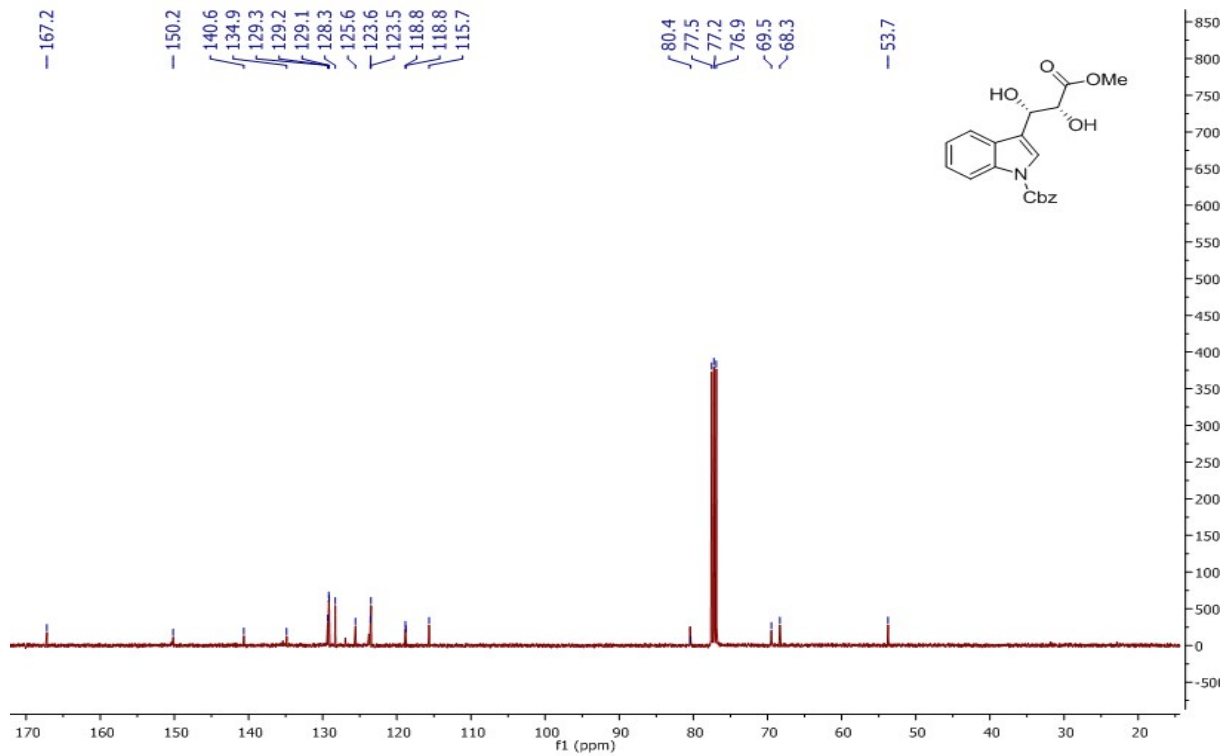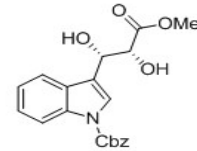

$^1\text{H}$  NMR (400 MHz,  $\text{CDCl}_3$ ) and  $^{13}\text{C}$  NMR (100 MHz,  $\text{CDCl}_3$ ) of compound C

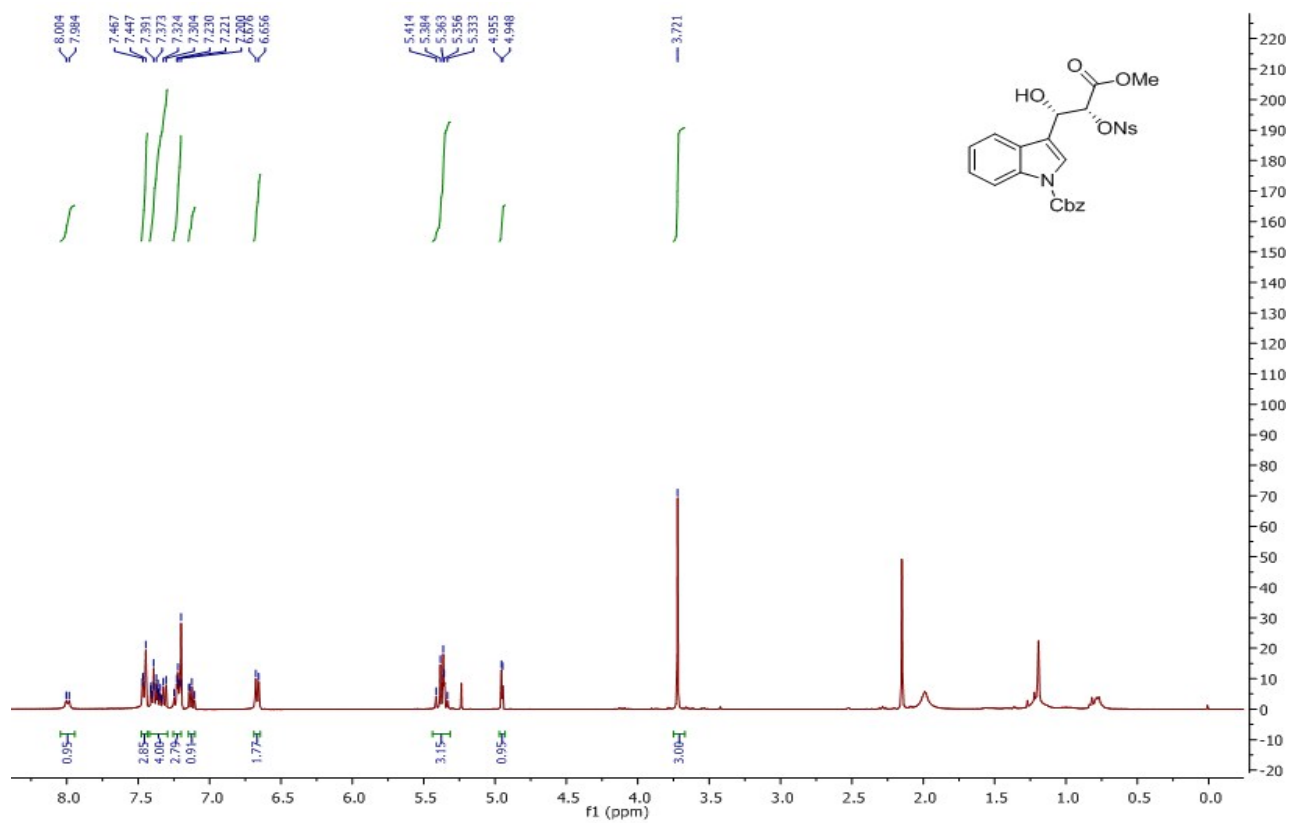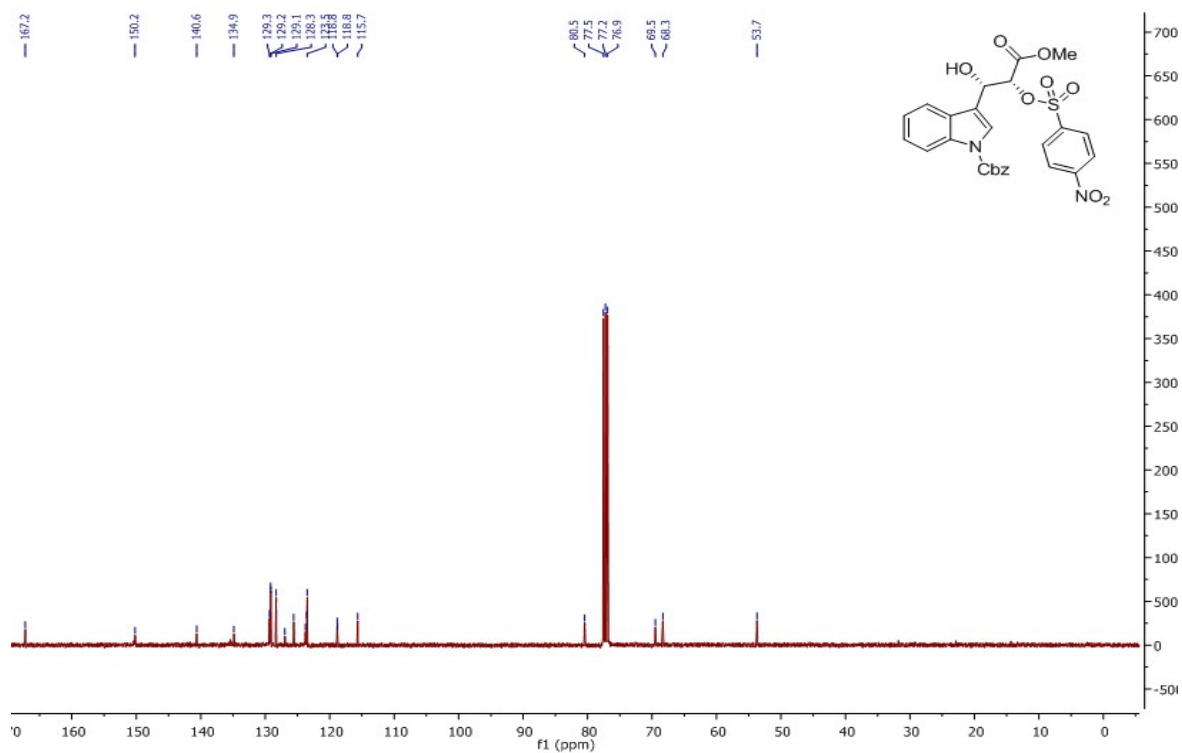

$^1\text{H}$  NMR (400 MHz,  $\text{CDCl}_3$ ) and  $^{13}\text{C}$  NMR (100 MHz,  $\text{CDCl}_3$ ) of compound **1a**

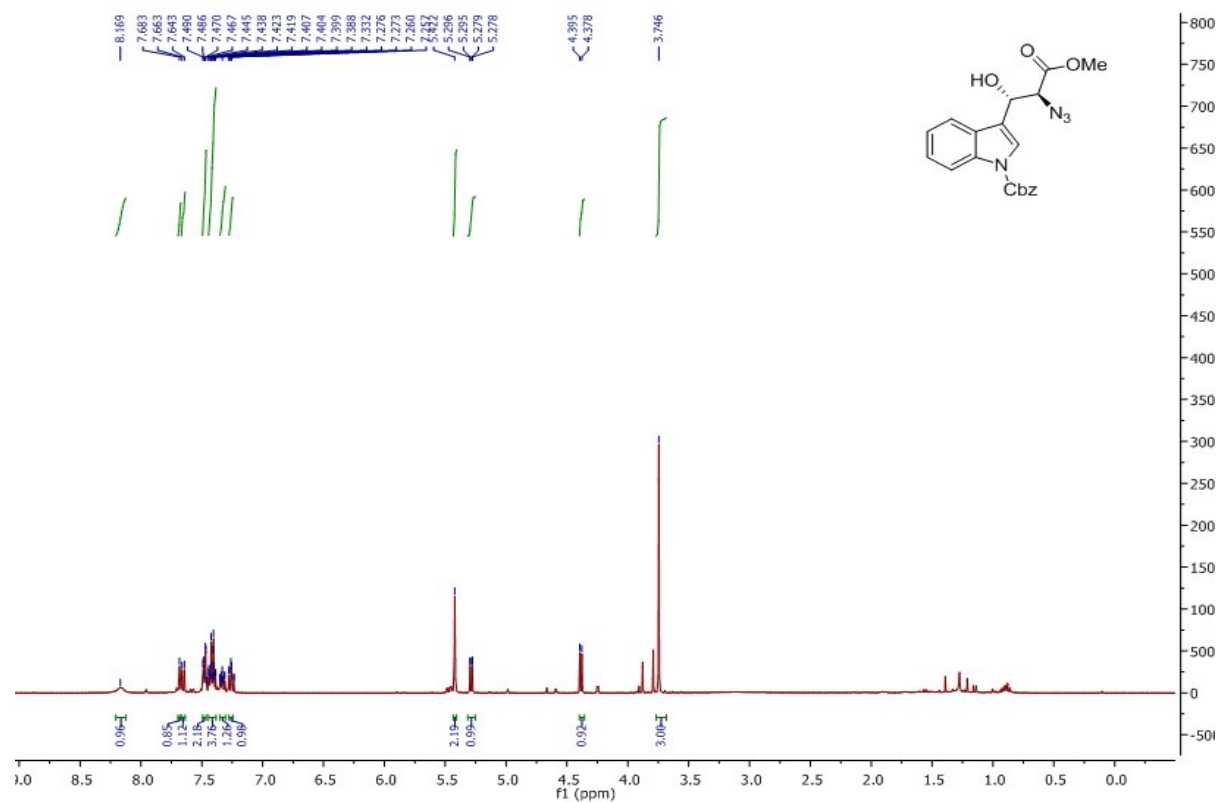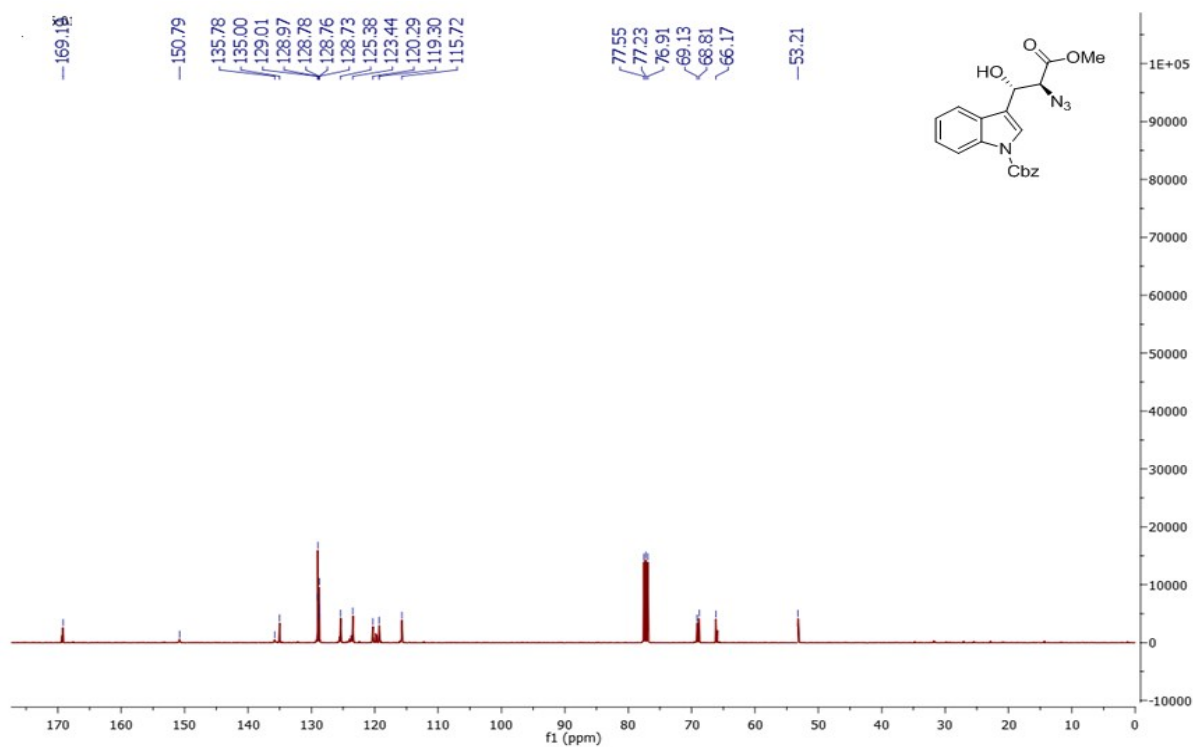

$^1\text{H}$  NMR (400 MHz,  $\text{CDCl}_3$ ) and  $^{13}\text{C}$  NMR (100 MHz,  $\text{CDCl}_3$ ) of compound **3b**

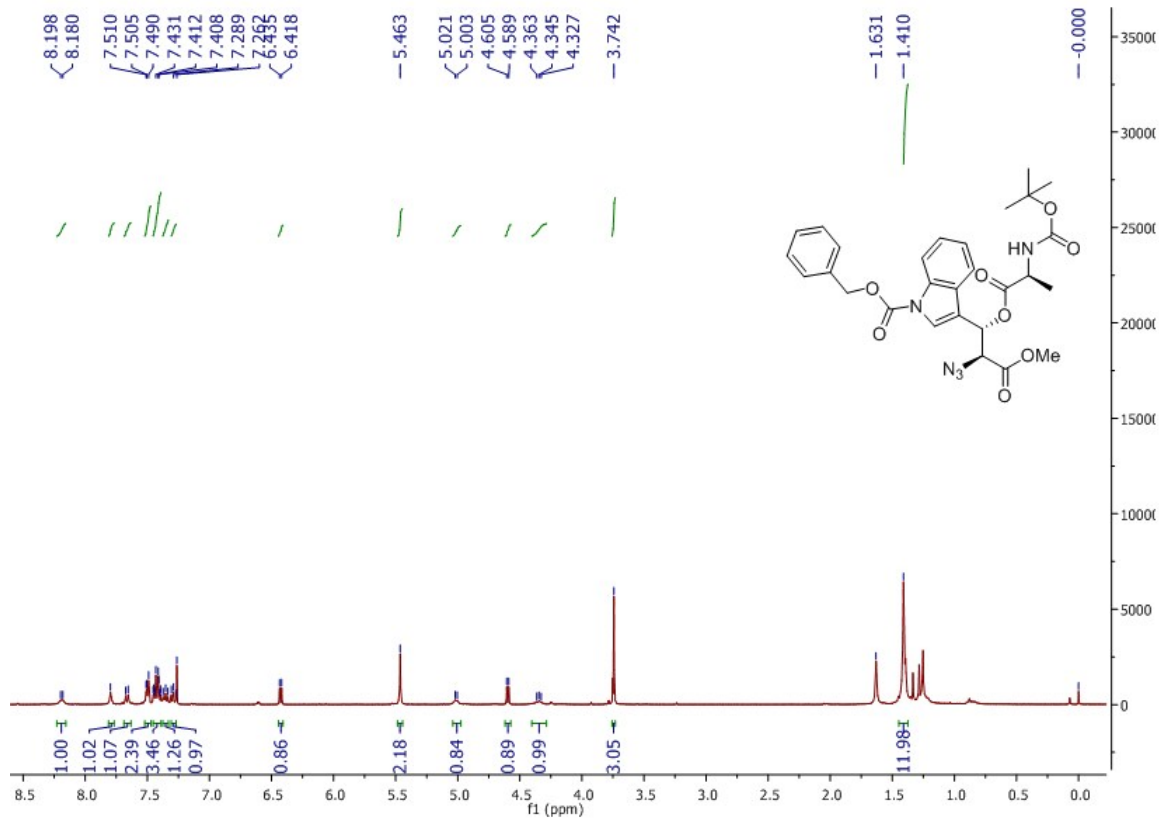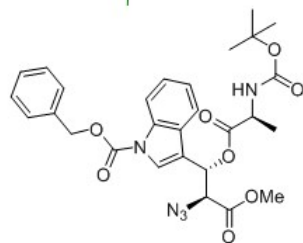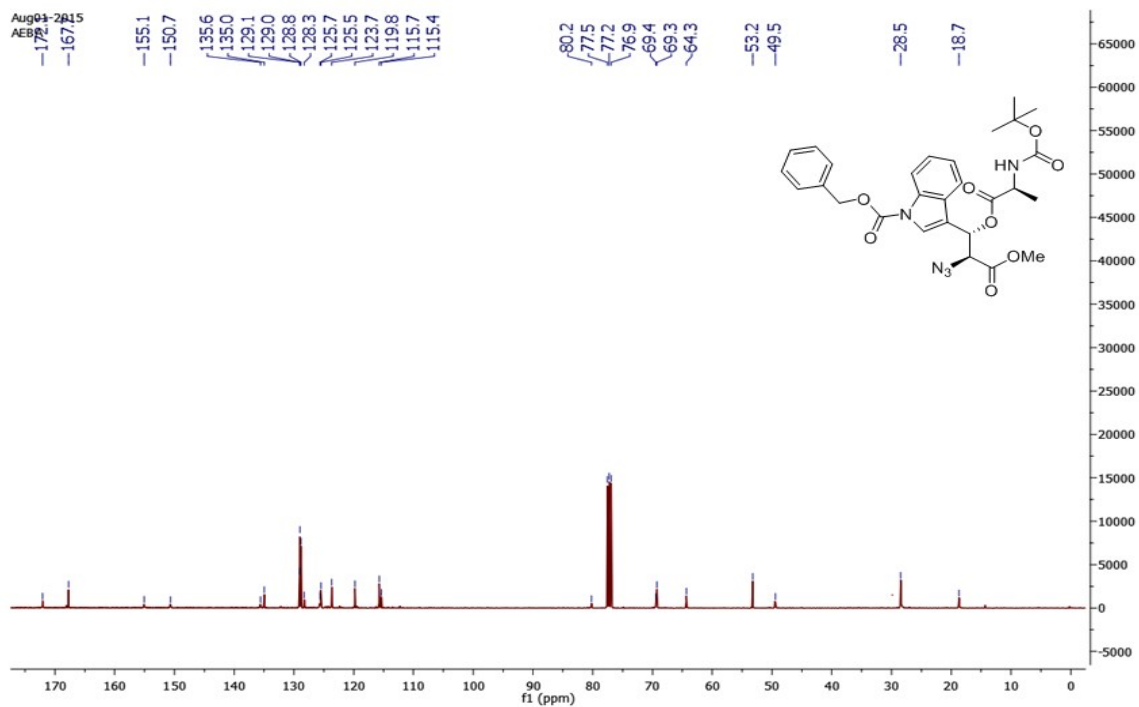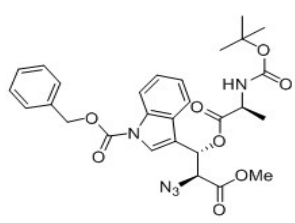

$^1\text{H}$  NMR (400 MHz,  $\text{CDCl}_3$ ) and  $^{13}\text{C}$  NMR (100 MHz,  $\text{CDCl}_3$ ) of compound **3c**

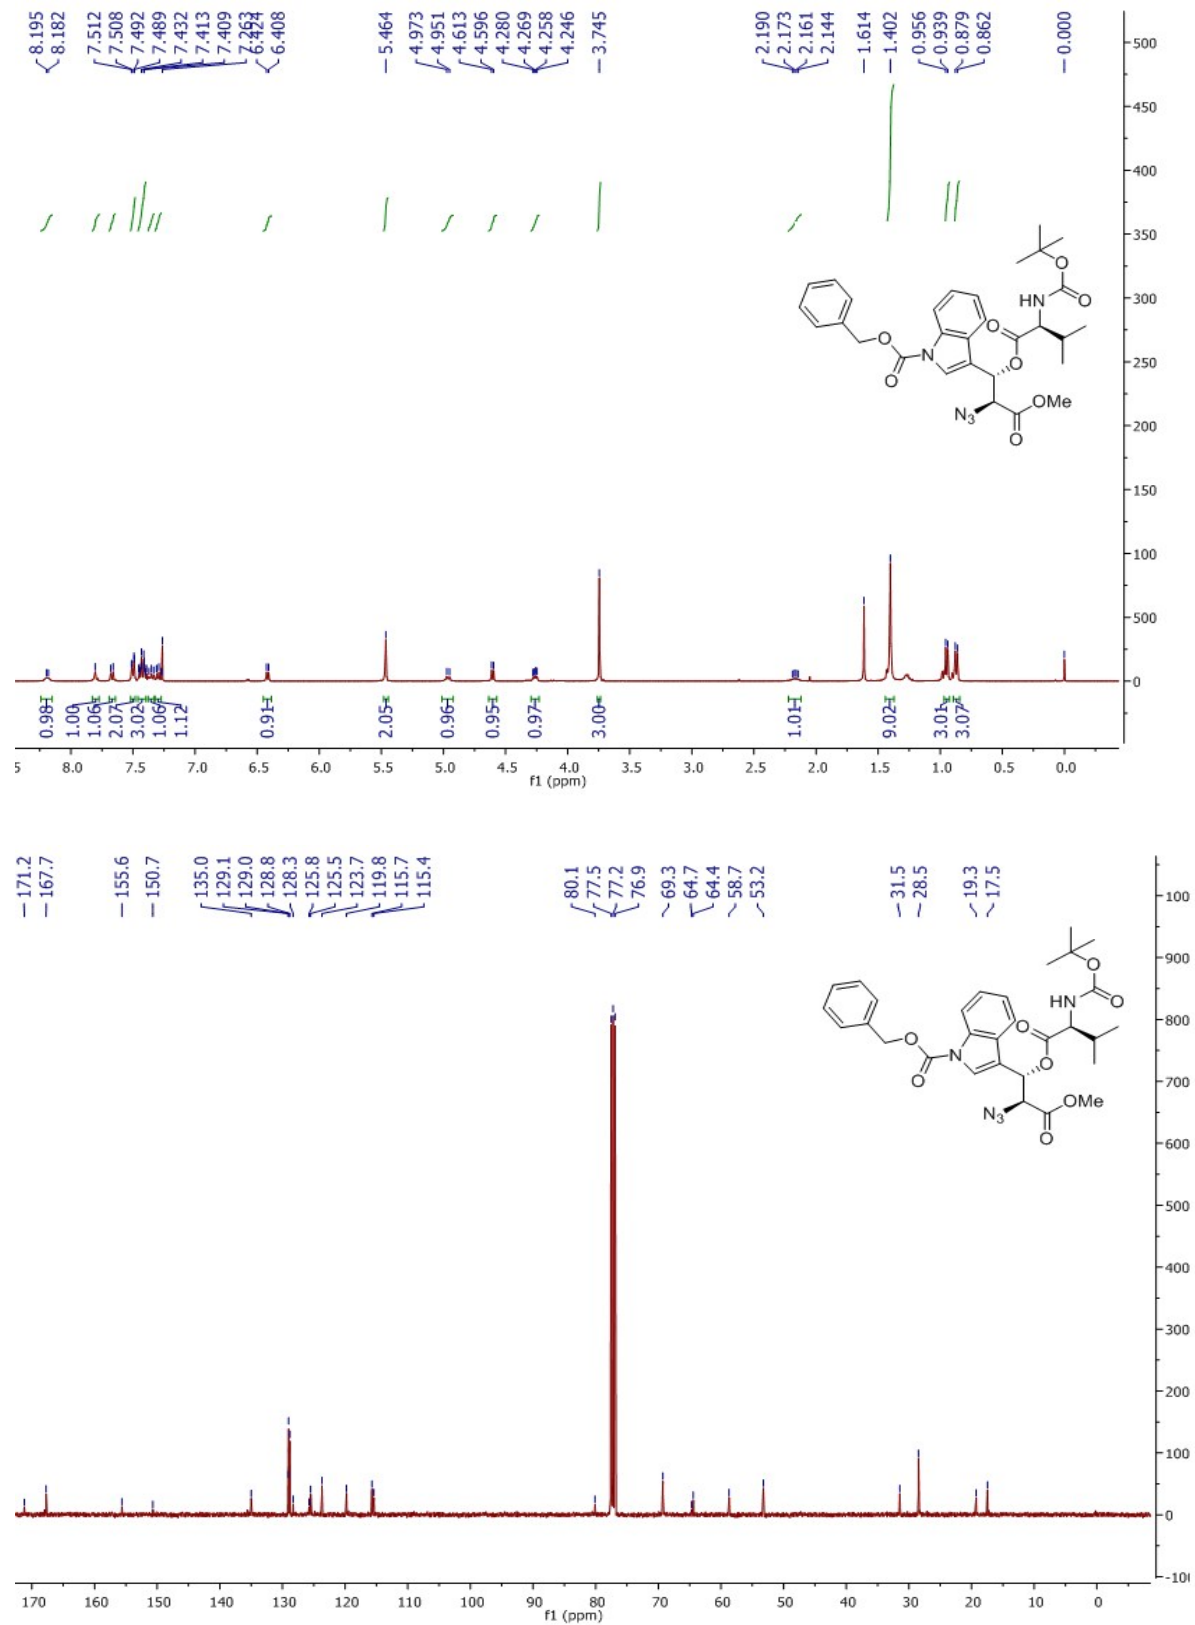



$^1\text{H}$  NMR (400 MHz,  $\text{CDCl}_3$ ) and  $^{13}\text{C}$  NMR (100 MHz,  $\text{CDCl}_3$ ) of compound **3d**

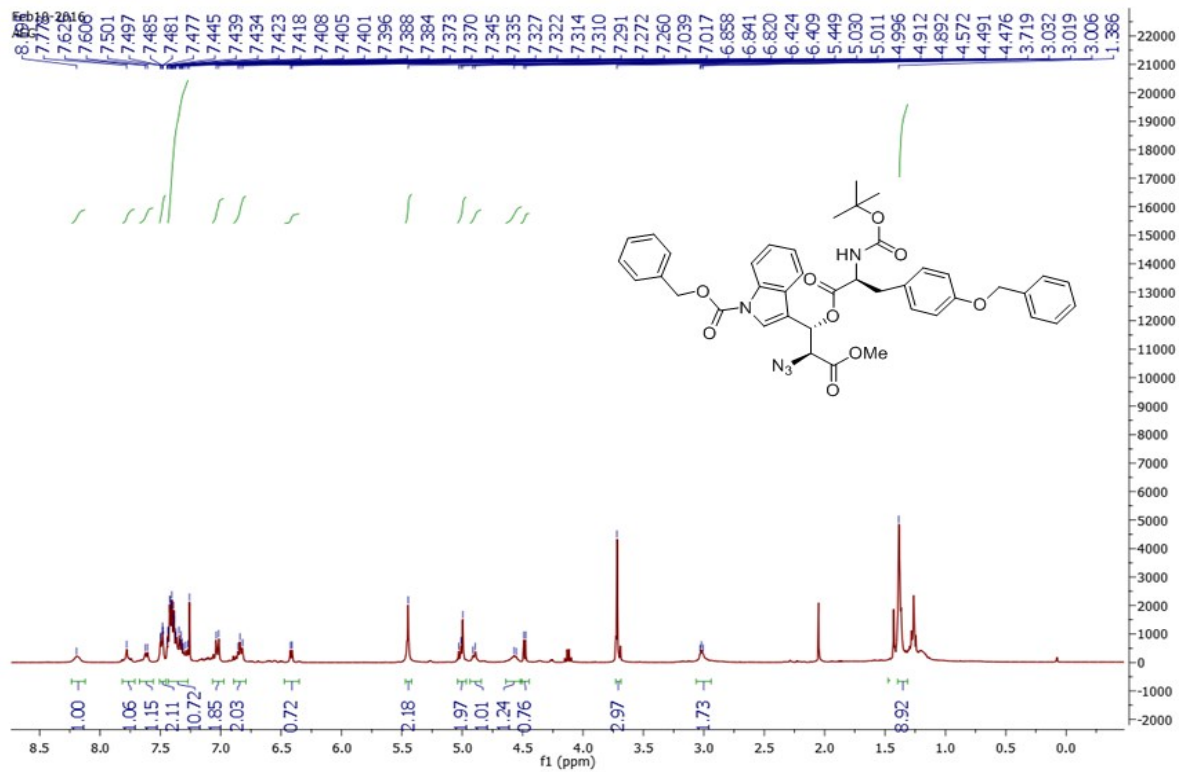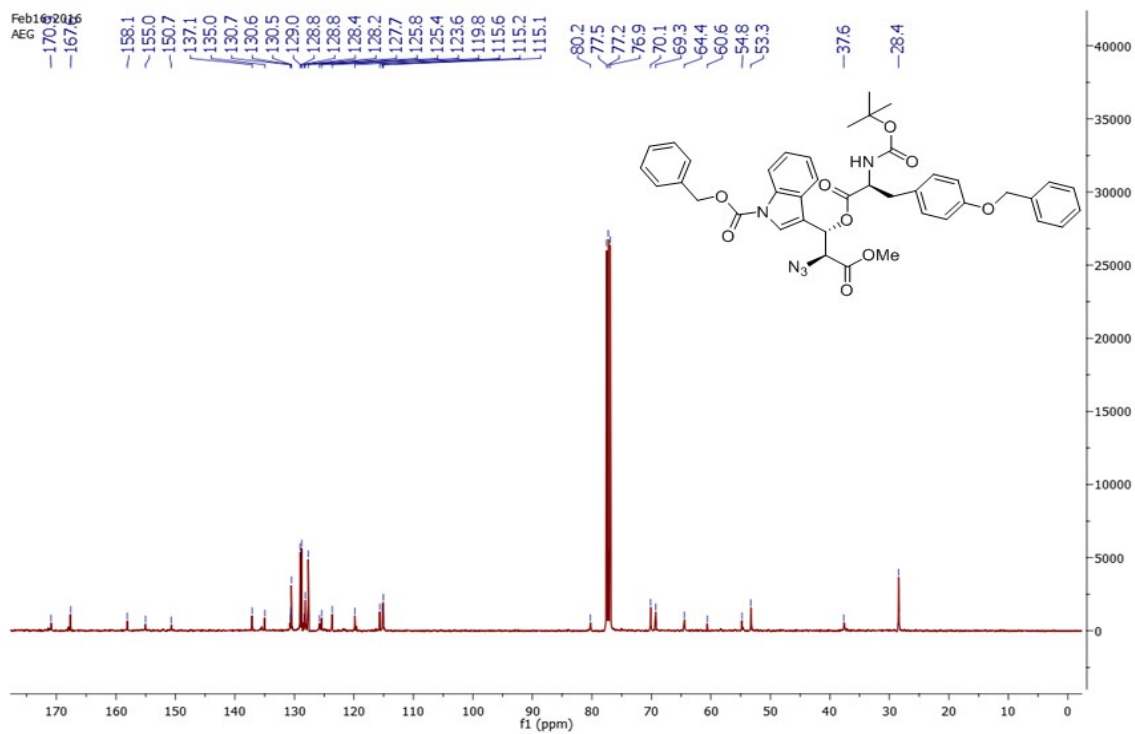

$^1\text{H}$  NMR (400 MHz,  $\text{CDCl}_3$ ) and  $^{13}\text{C}$  NMR (100 MHz,  $\text{CDCl}_3$ ) of compound **3e**

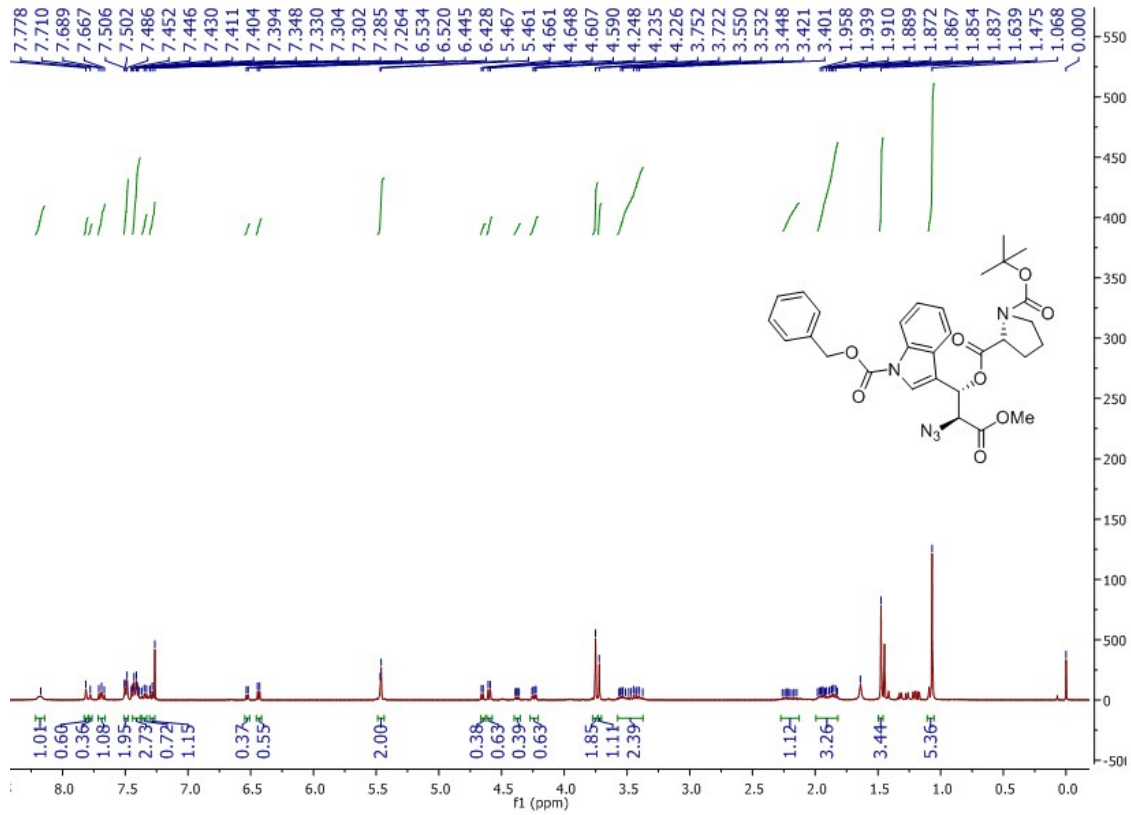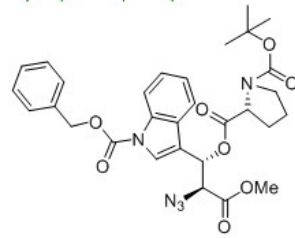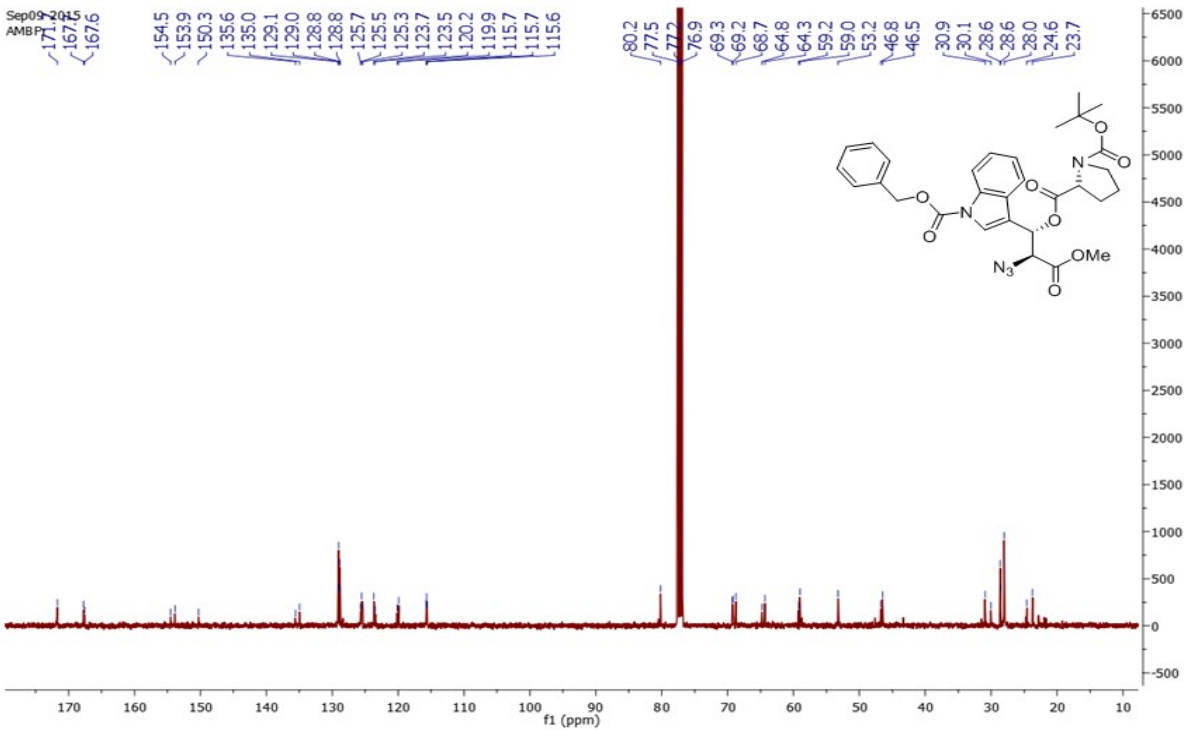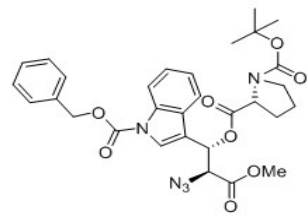

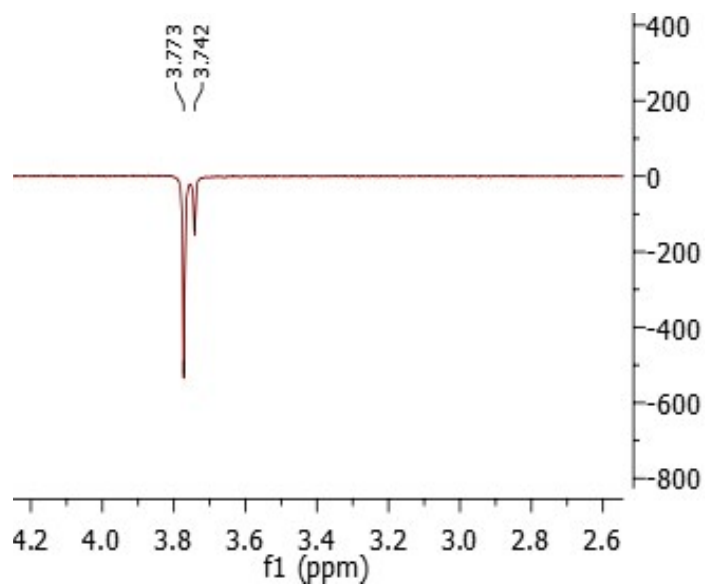

Fig 1a: 1D gradient NOE spectrum of compound **3e** with an initial selective pulse at 3.77 ppm creates a peak at 3.77 ppm as well as a new peak of the same phase at 3.74 ppm due to rotameric chemical exchange.

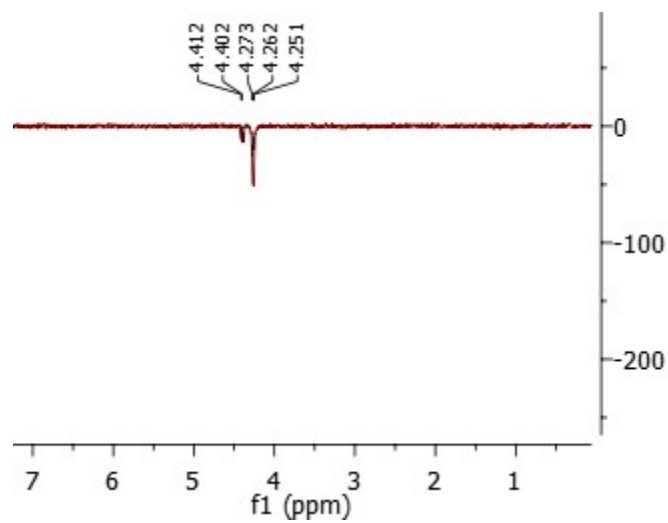

Fig 1b: 1D gradient NOE spectrum of compound **3e** with an initial selective pulse at 4.26 ppm creates a new peak of the same phase at 4.41 ppm due to rotameric chemical exchange.

$^1\text{H}$  NMR (400 MHz,  $\text{CDCl}_3$ ) and  $^{13}\text{C}$  NMR (100 MHz,  $\text{CDCl}_3$ ) of compound **3f**

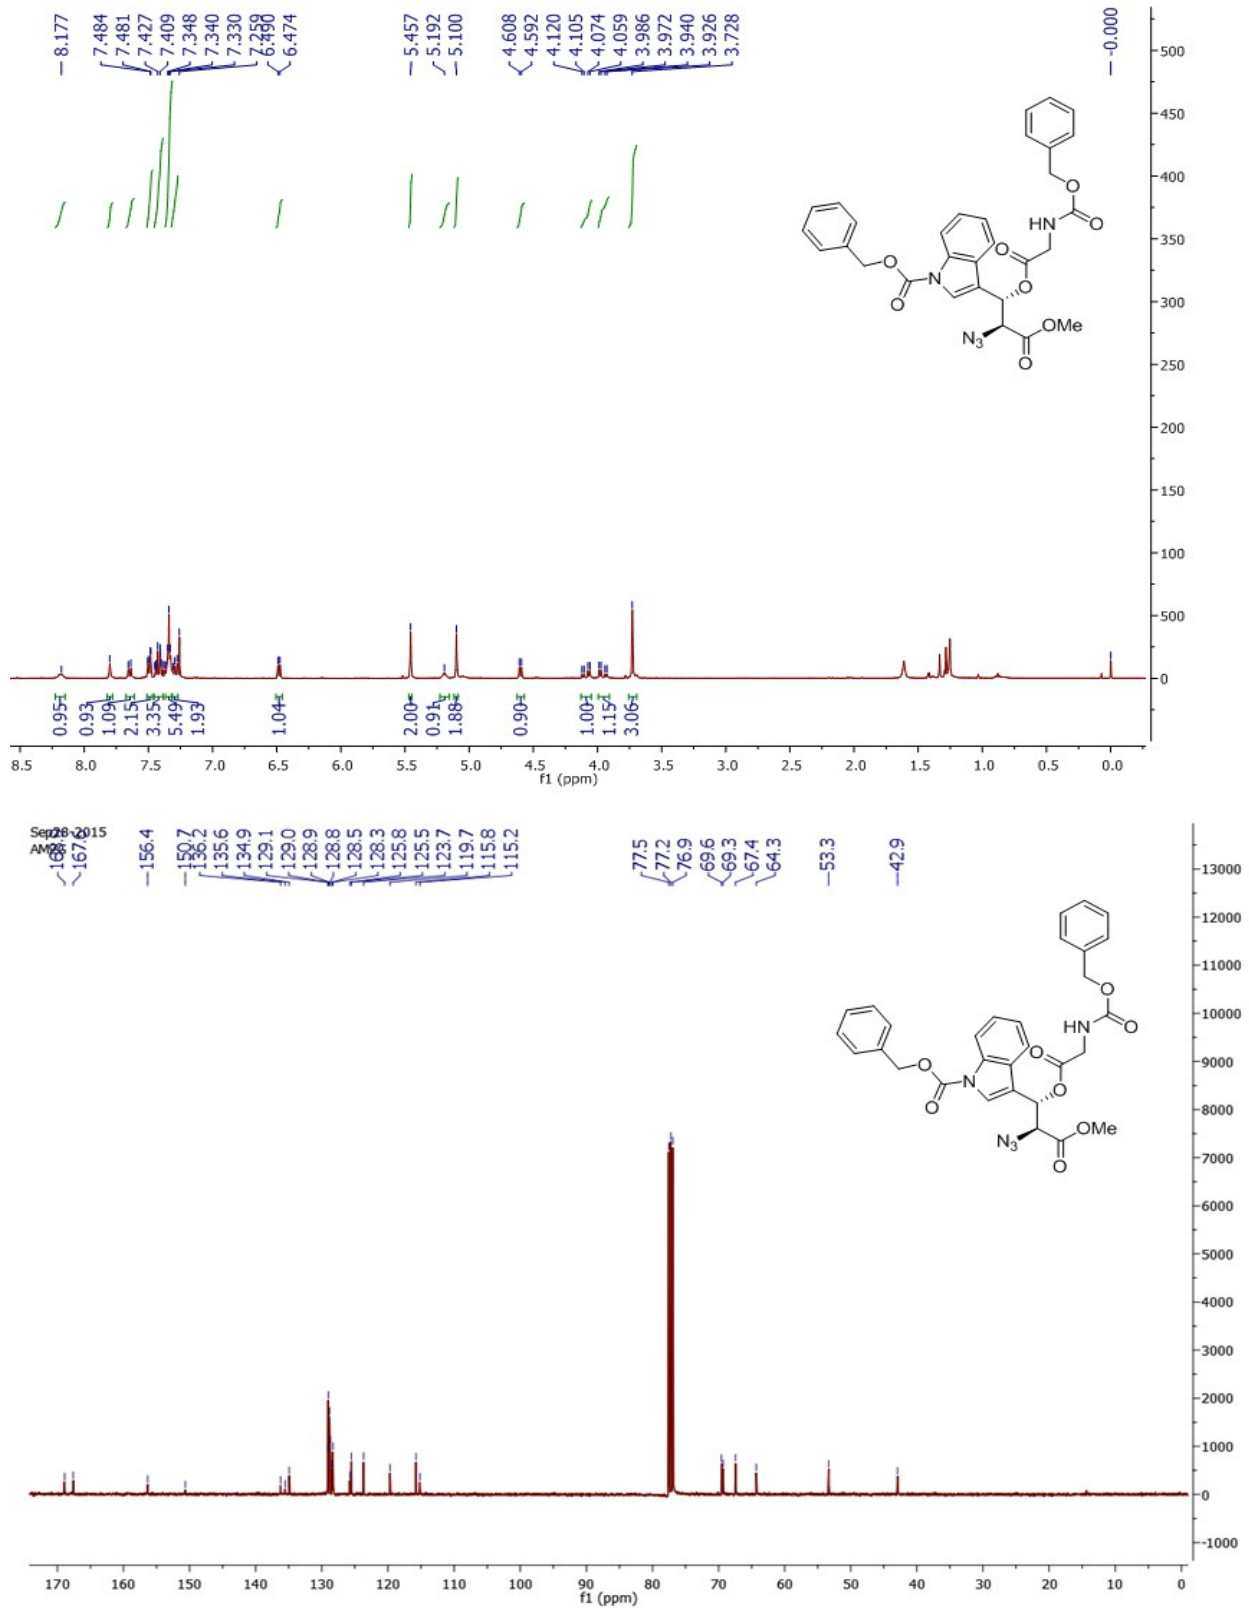

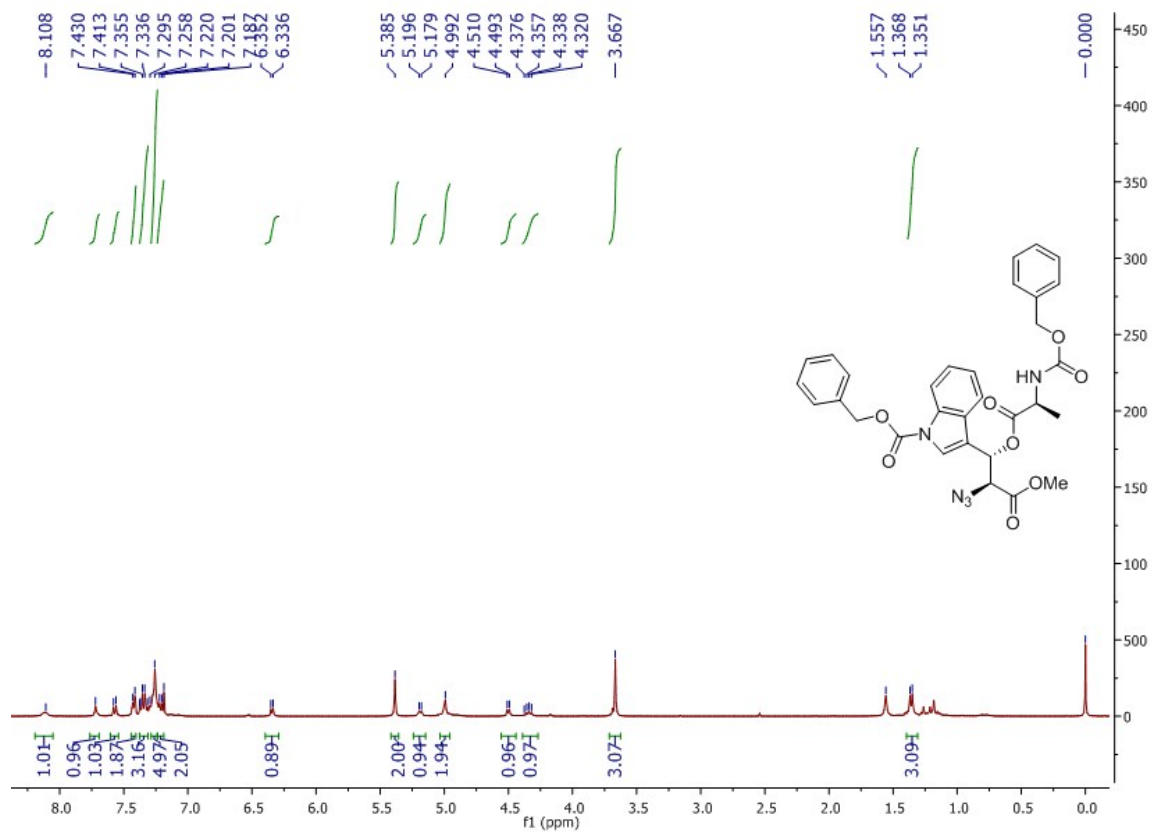

**<sup>1</sup>H NMR (400 MHz, CDCl<sub>3</sub>) and <sup>13</sup>C NMR (100 MHz, CDCl<sub>3</sub>) of compound 3g**

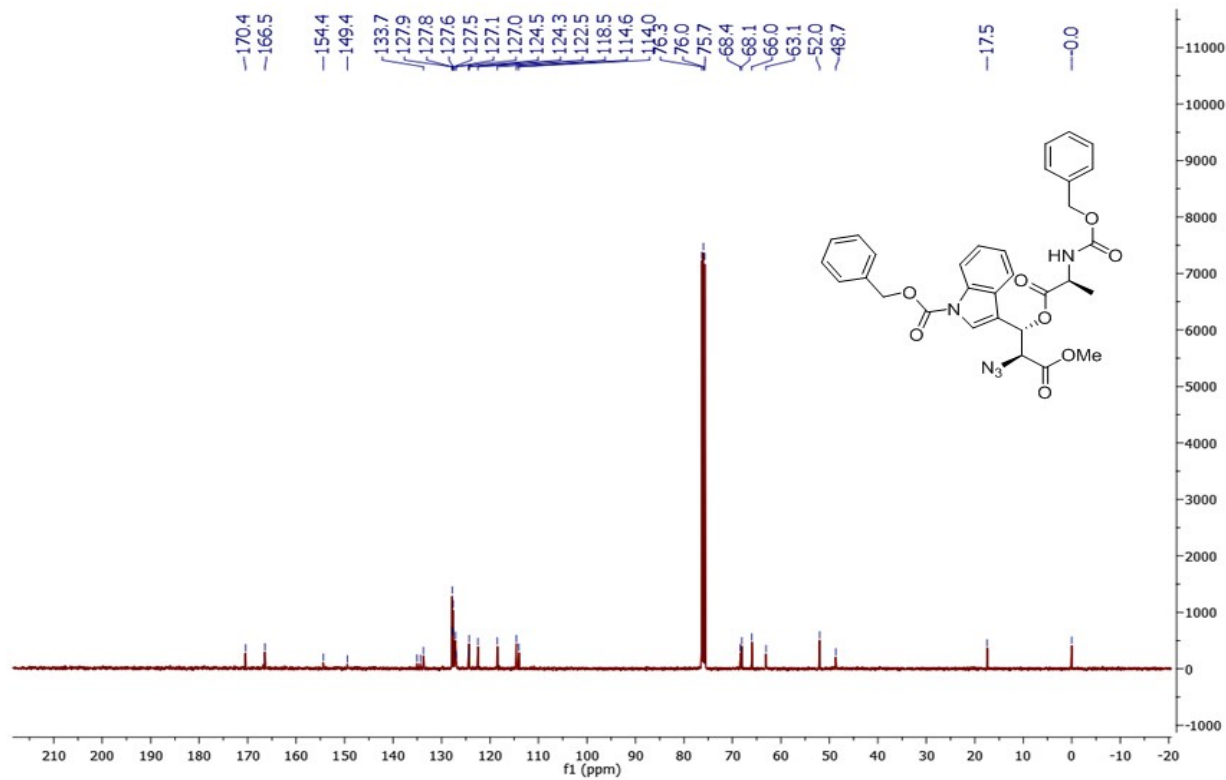

$^1\text{H}$  NMR (400 MHz,  $\text{CDCl}_3$ ) and  $^{13}\text{C}$  NMR (100 MHz,  $\text{CDCl}_3$ ) of compound **3h**

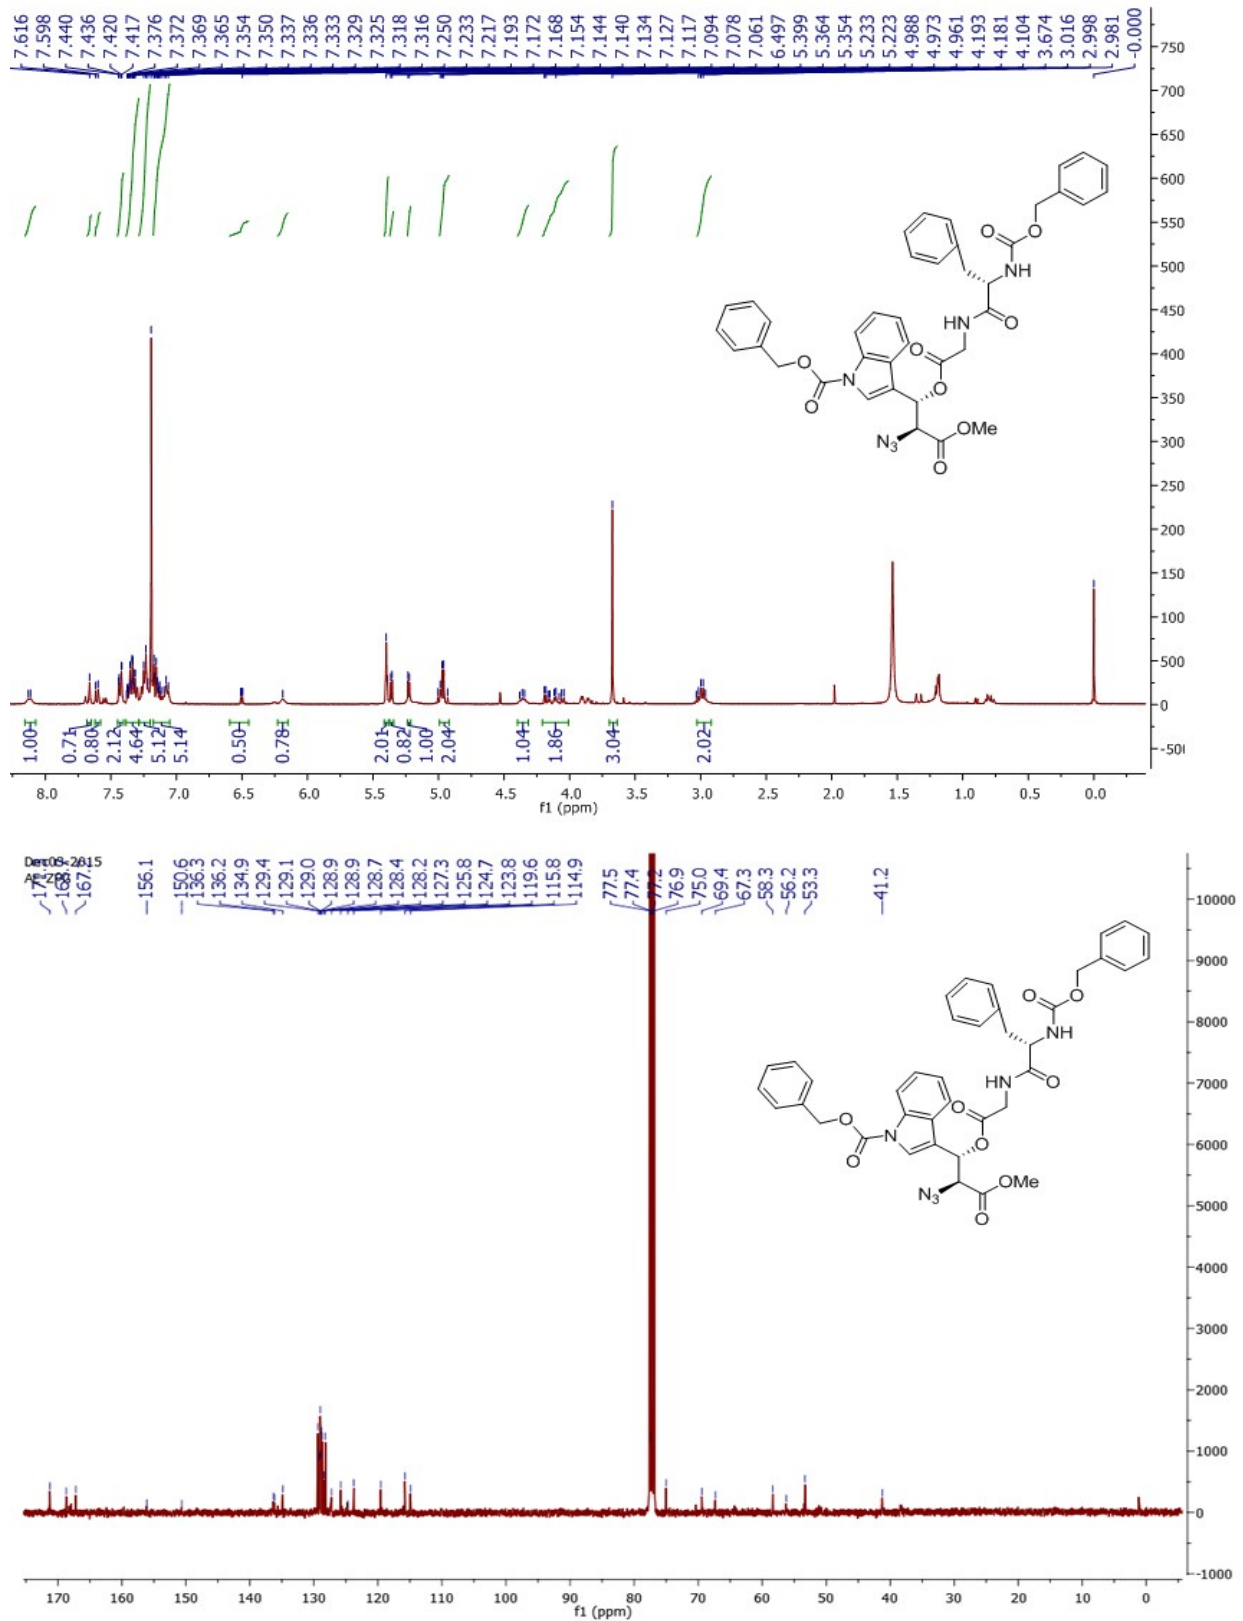

$^1\text{H}$  NMR (400 MHz,  $\text{CDCl}_3$ ) and  $^{13}\text{C}$  NMR (100 MHz,  $\text{CDCl}_3$ ) of compound **3i**

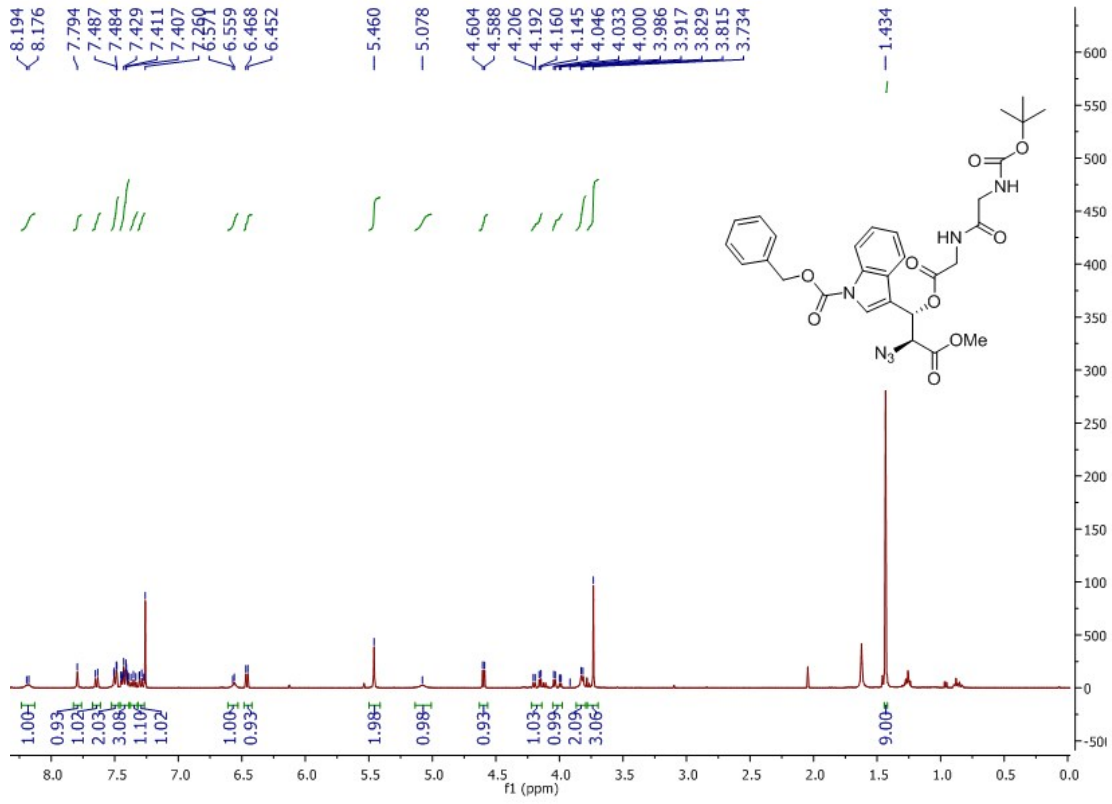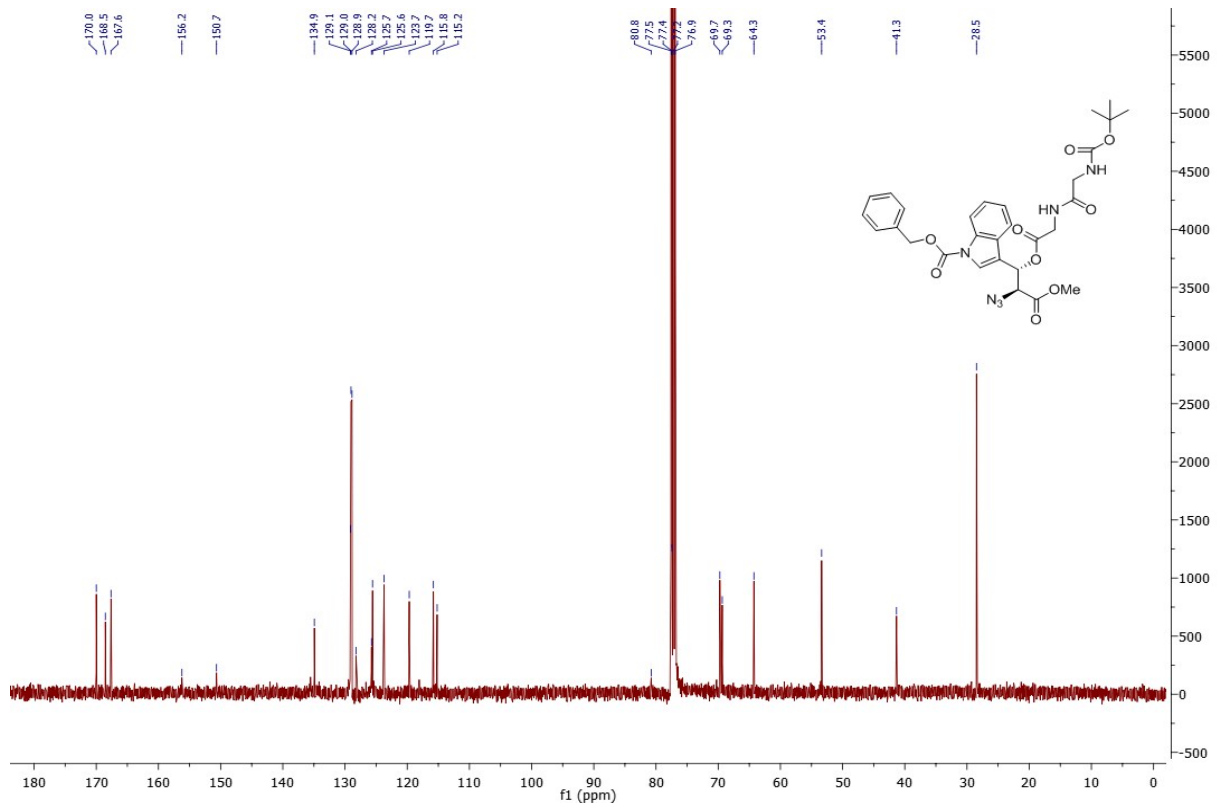

$^1\text{H}$  NMR (400 MHz,  $\text{CDCl}_3$ ) and  $^{13}\text{C}$  NMR (100 MHz,  $\text{CDCl}_3$ ) of compound **3j**

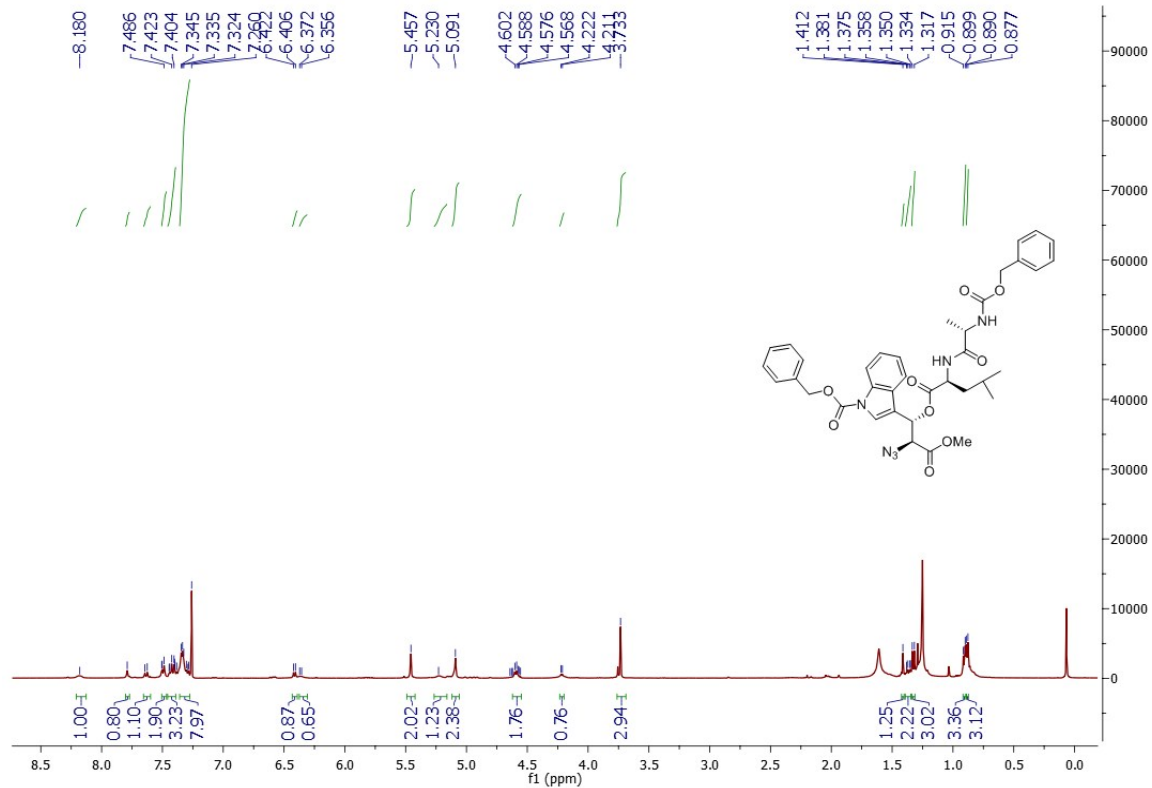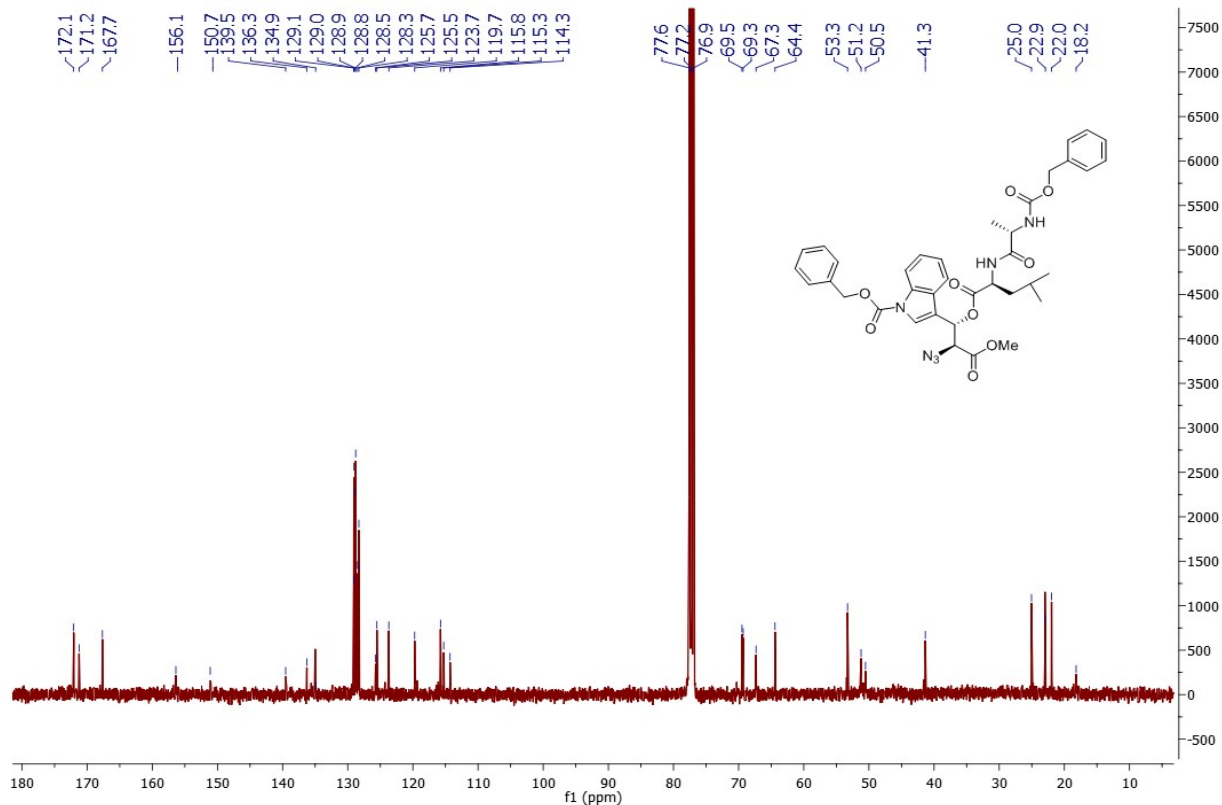



$^1\text{H}$  NMR (400 MHz,  $\text{CDCl}_3$ ) and  $^{13}\text{C}$  NMR (100 MHz,  $\text{CDCl}_3$ ) of compound **3k**

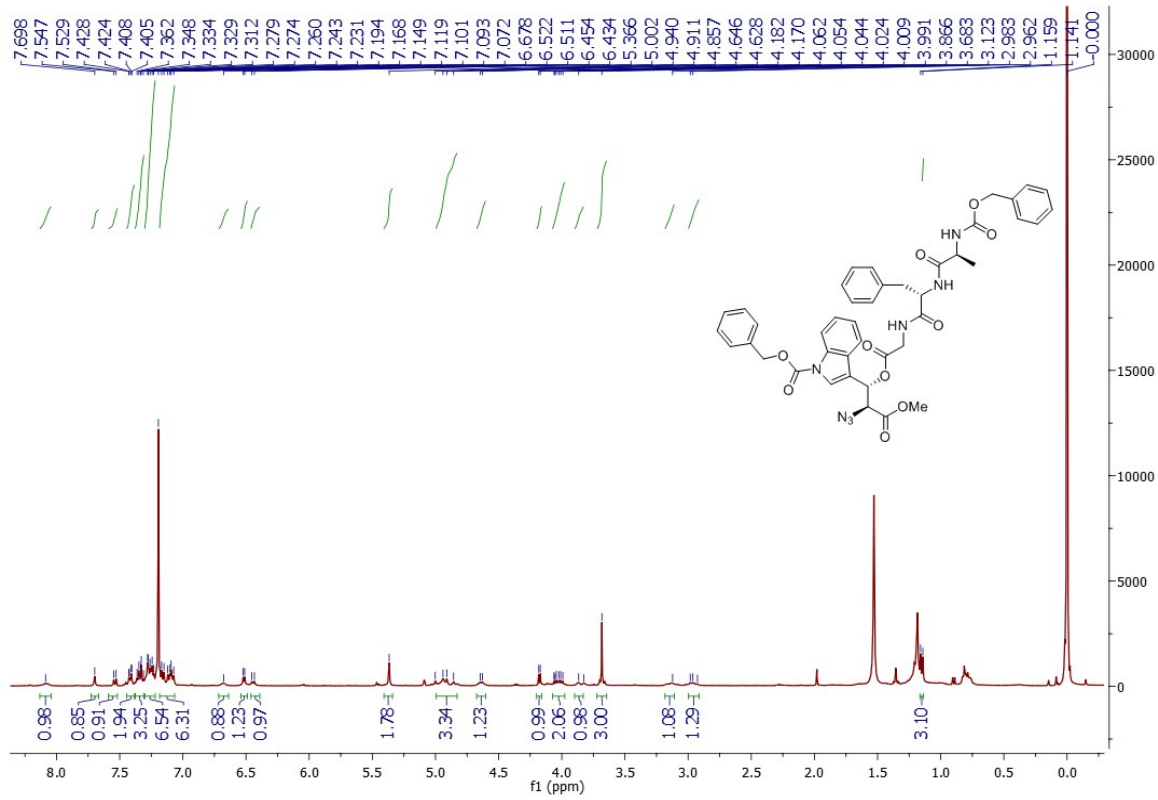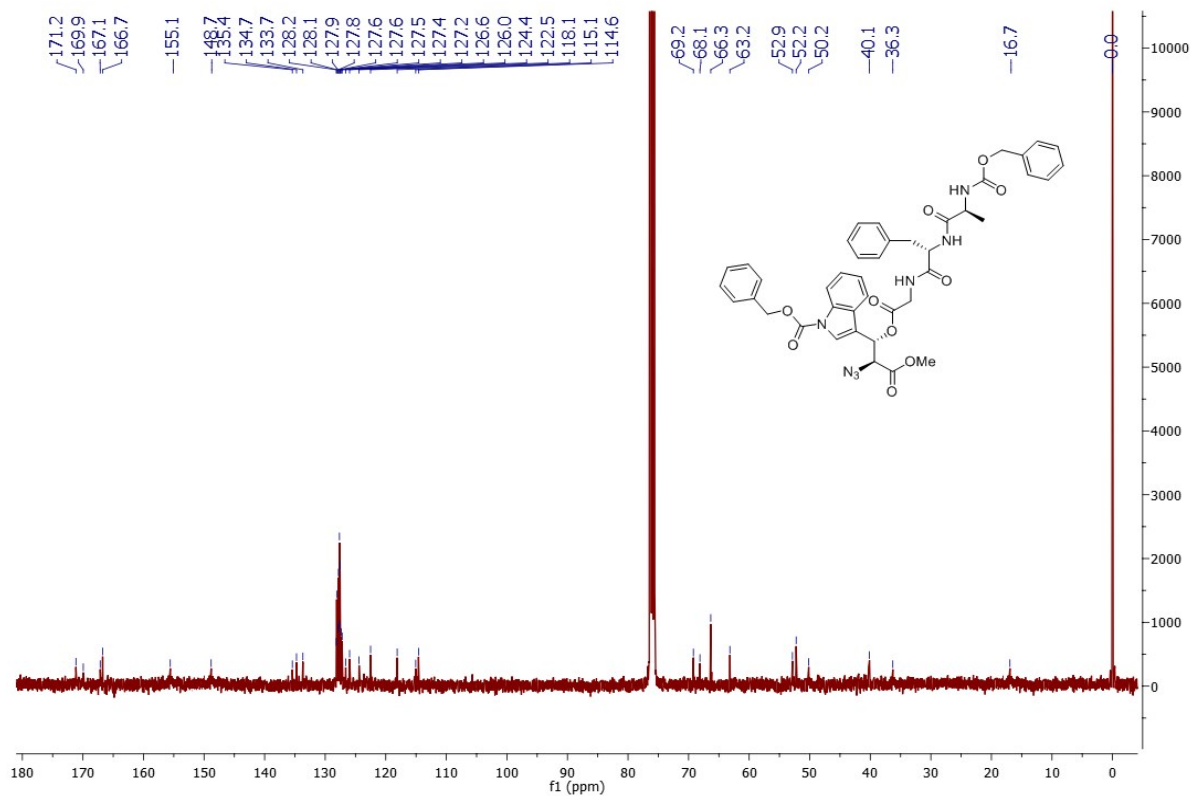

<sup>1</sup>H NMR (400 MHz, CDCl<sub>3</sub>) and <sup>13</sup>C NMR (100 MHz, CDCl<sub>3</sub>) of Ligated product **4a**

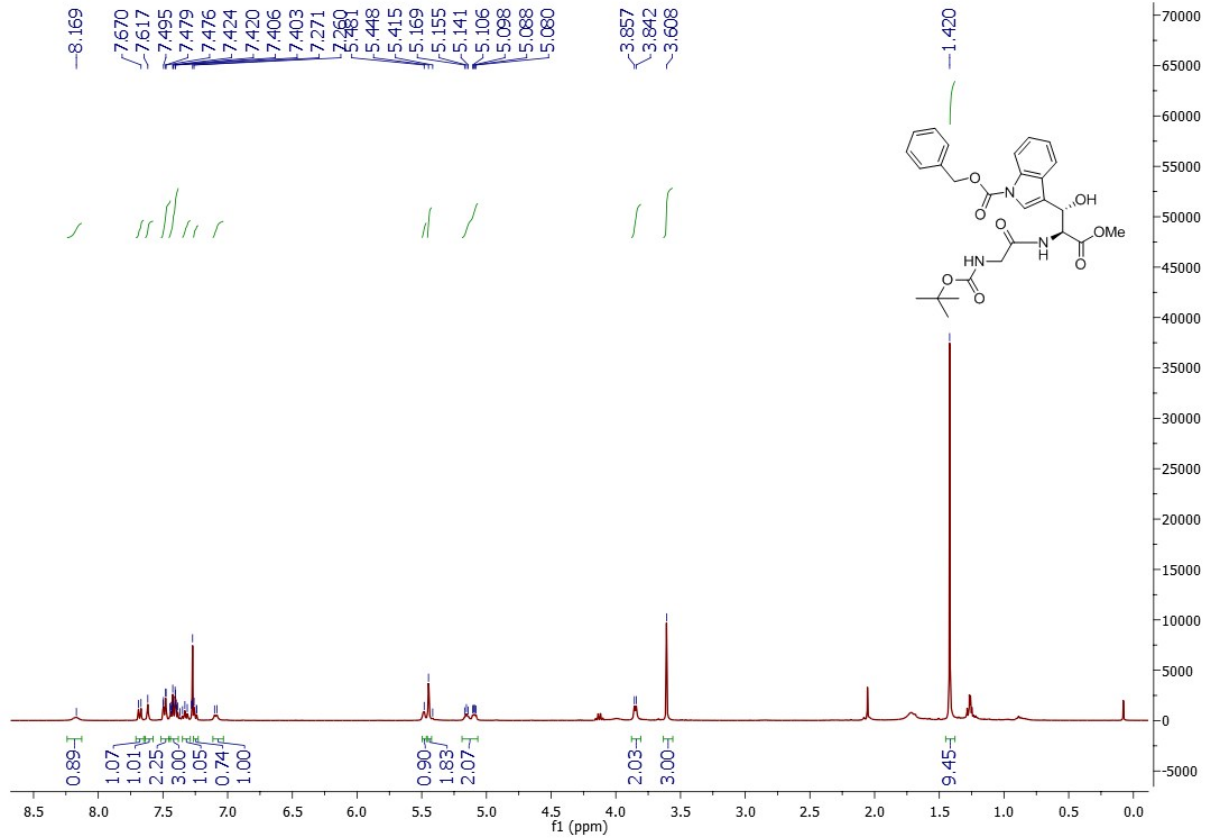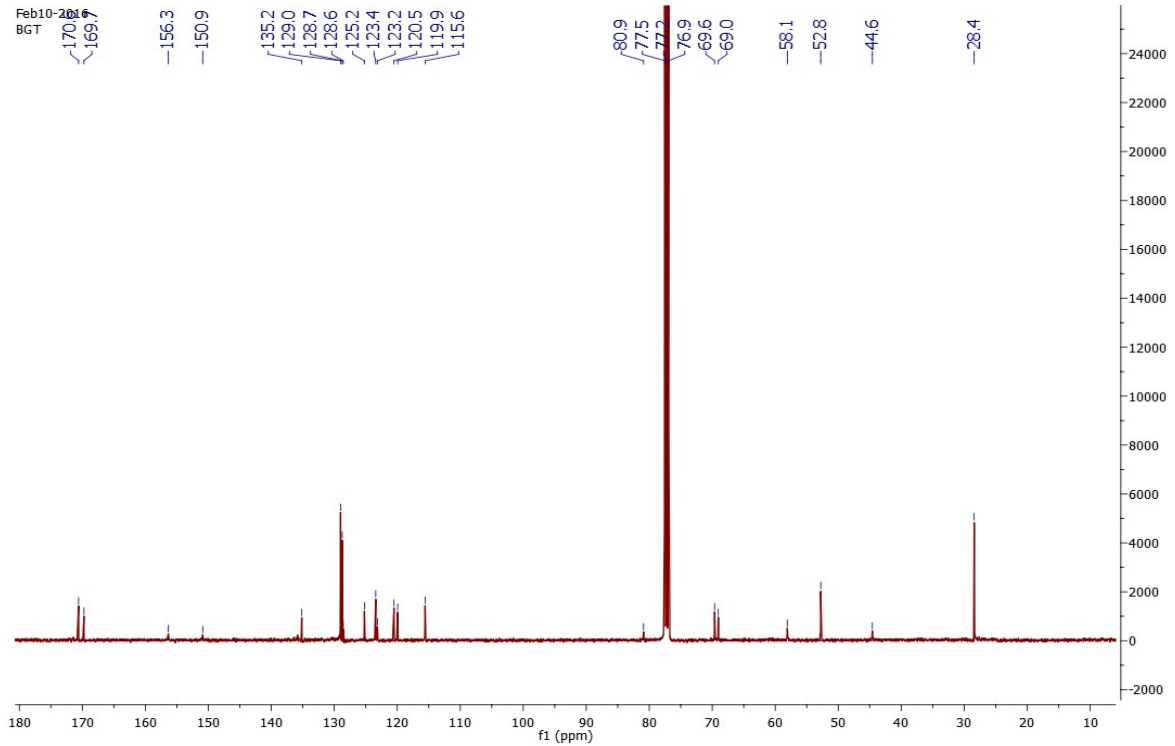



$^1\text{H}$  NMR (400 MHz,  $\text{CDCl}_3$ ) and  $^{13}\text{C}$  NMR (100 MHz,  $\text{CDCl}_3$ ) of Ligated product **4c**

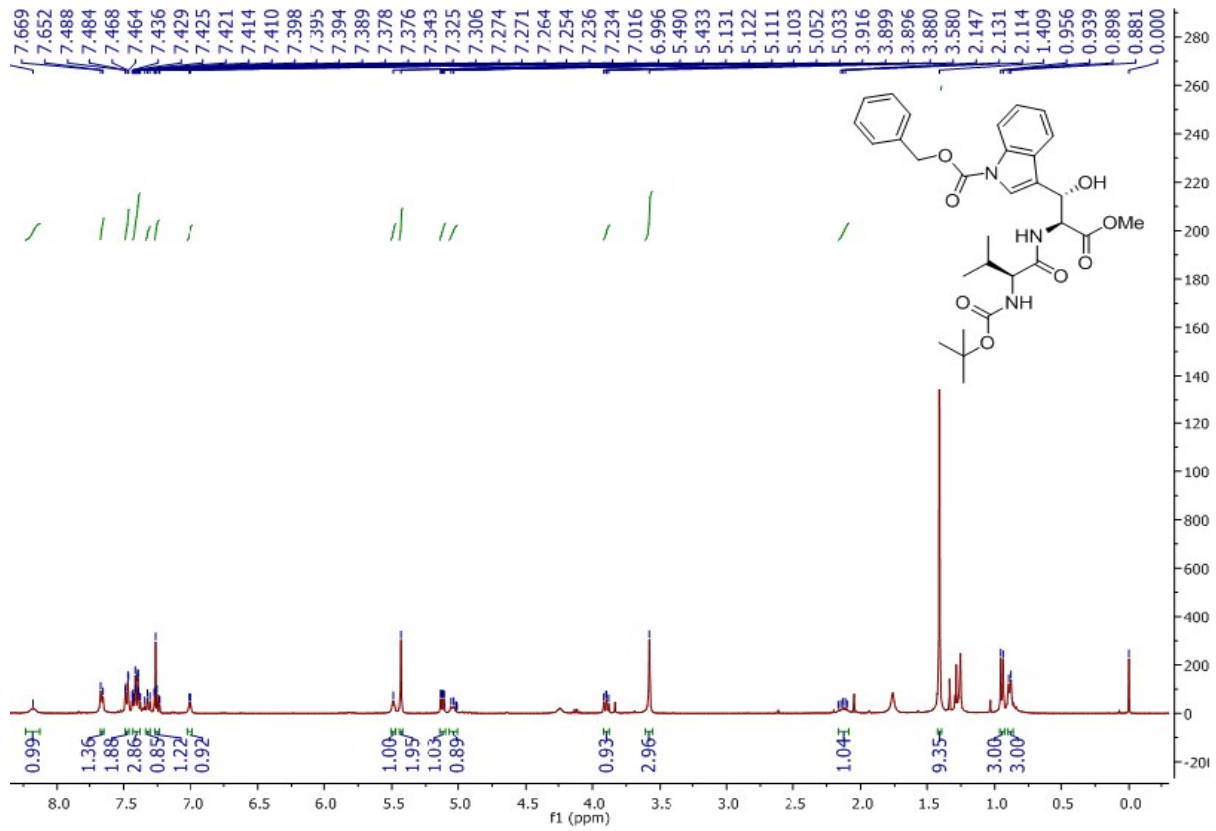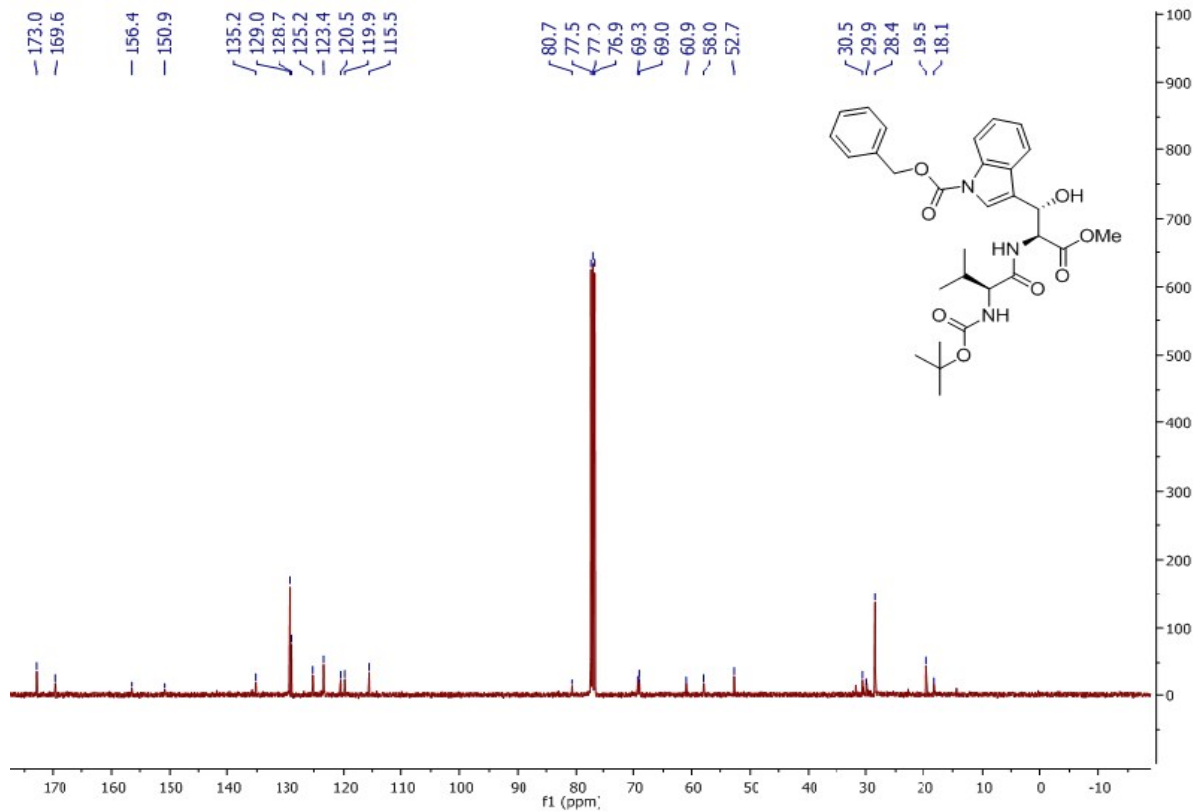

$^1\text{H}$  NMR (400 MHz,  $\text{CDCl}_3$ ) and  $^{13}\text{C}$  NMR (100 MHz,  $\text{CDCl}_3$ ) of Ligated product **4d**

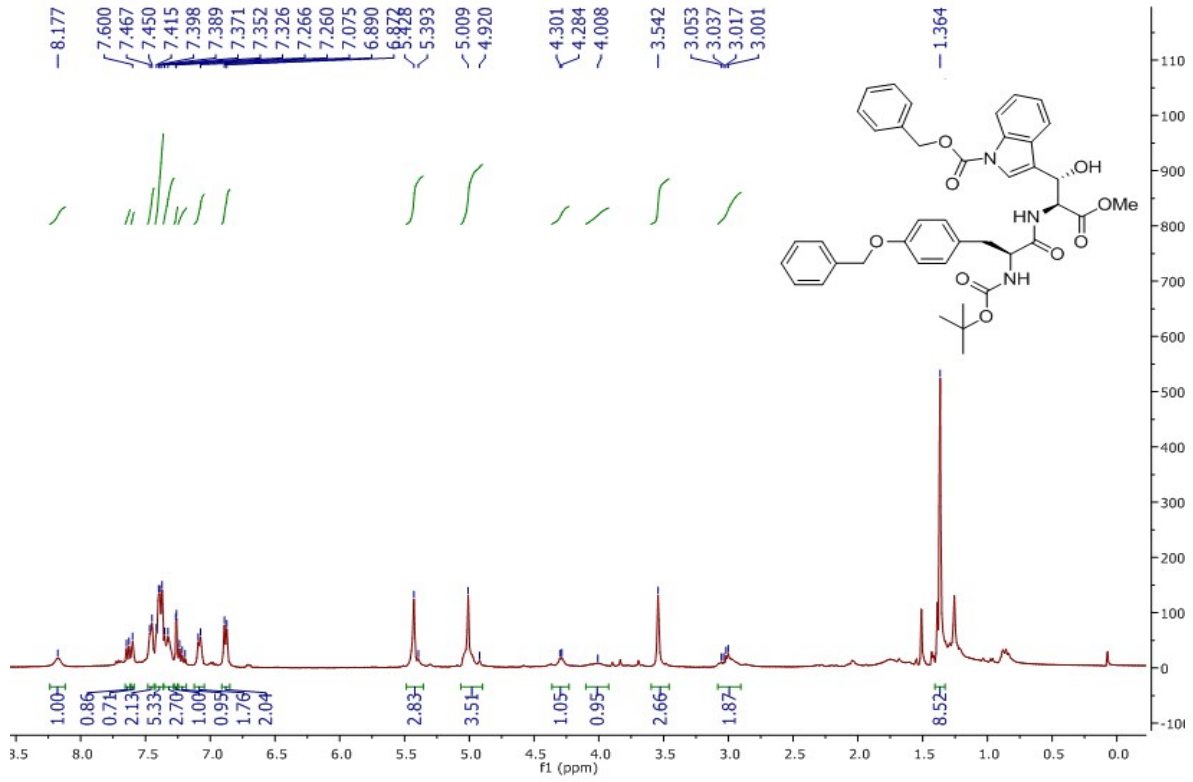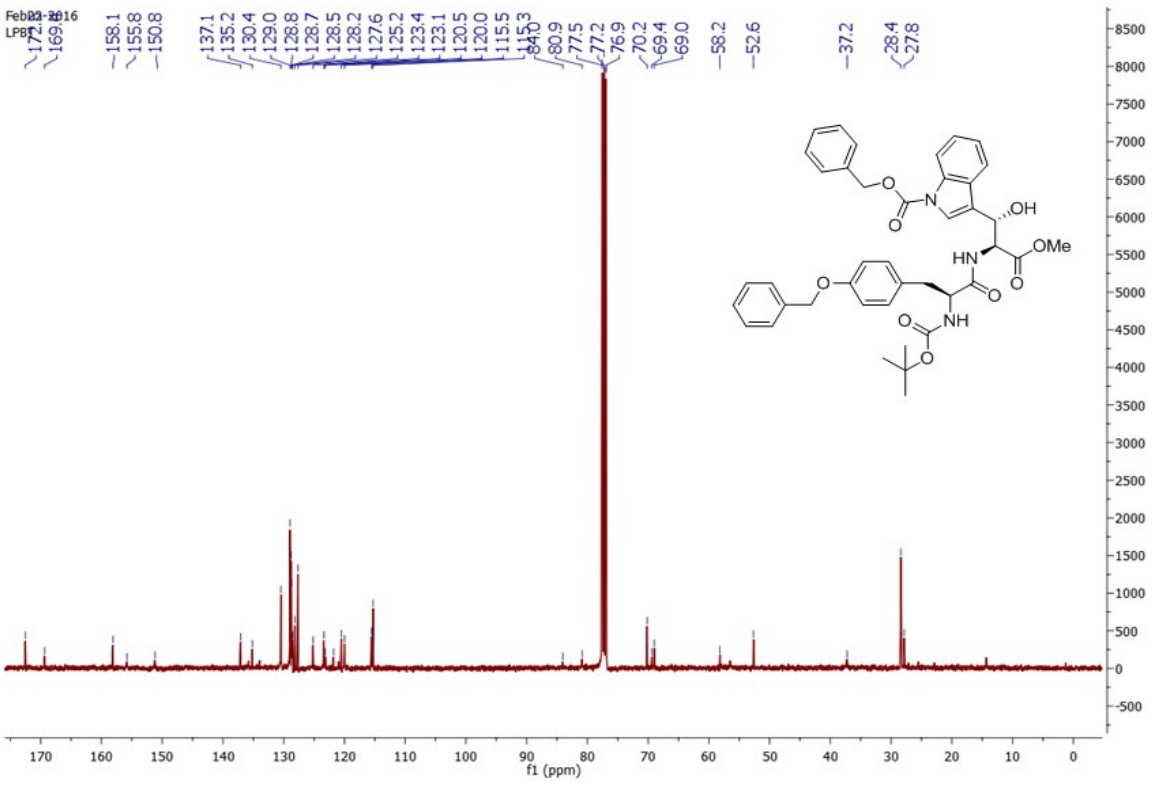

$^1\text{H}$  NMR (400 MHz,  $\text{CDCl}_3$ ) and  $^{13}\text{C}$  NMR (100 MHz,  $\text{CDCl}_3$ ) of Ligated product **4e**

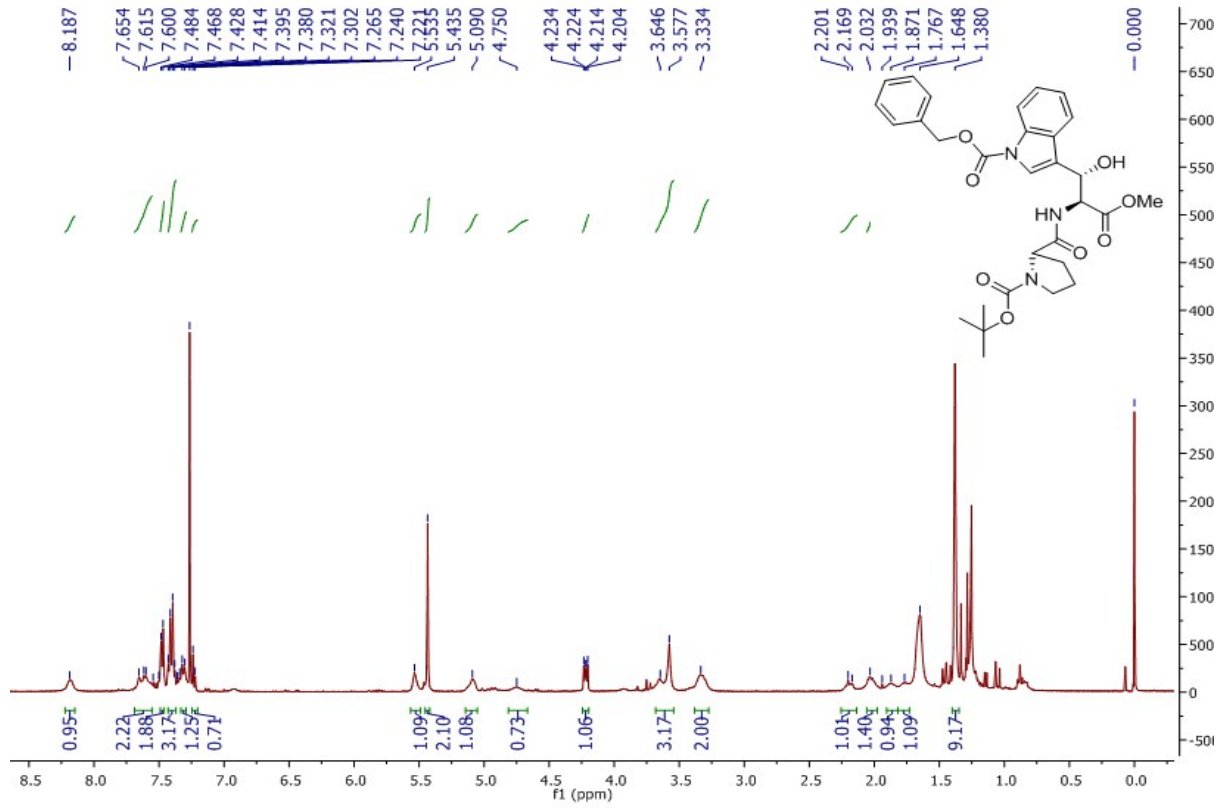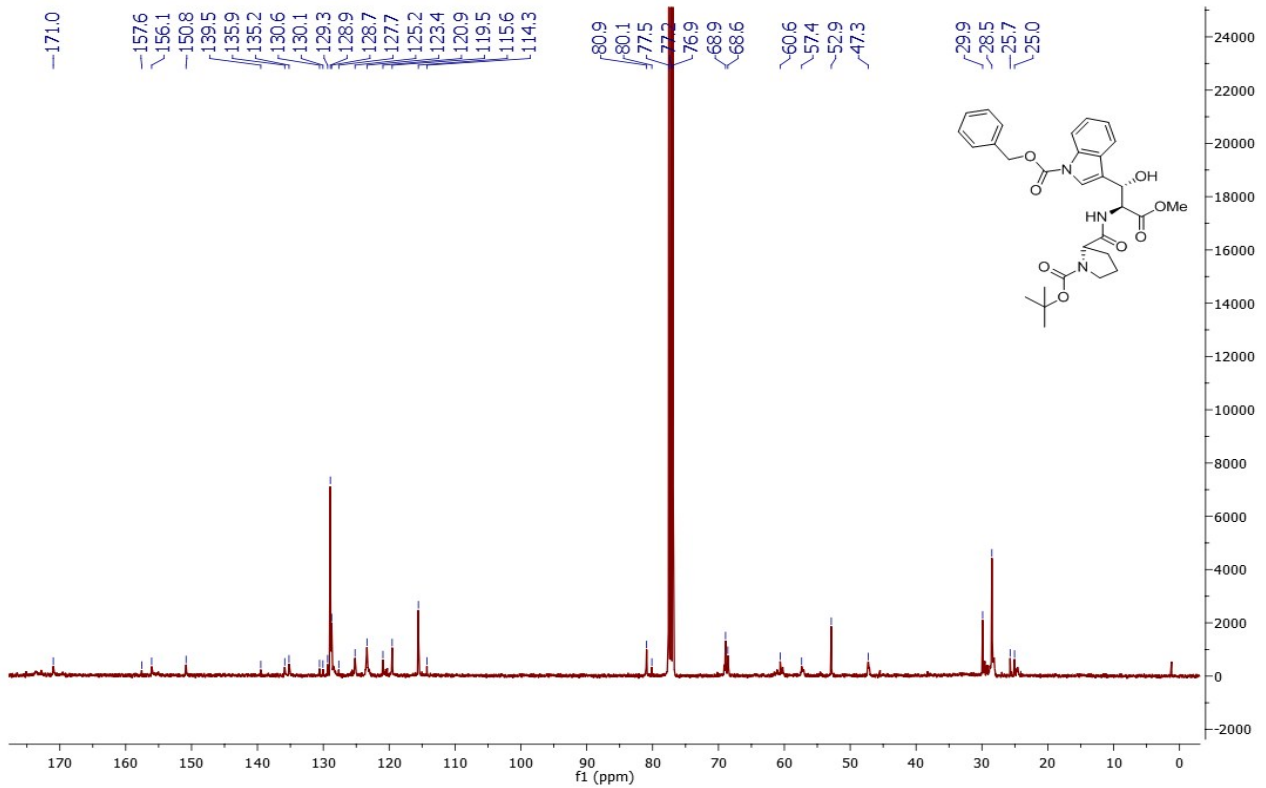

LC-MS data of ligated product **4e**

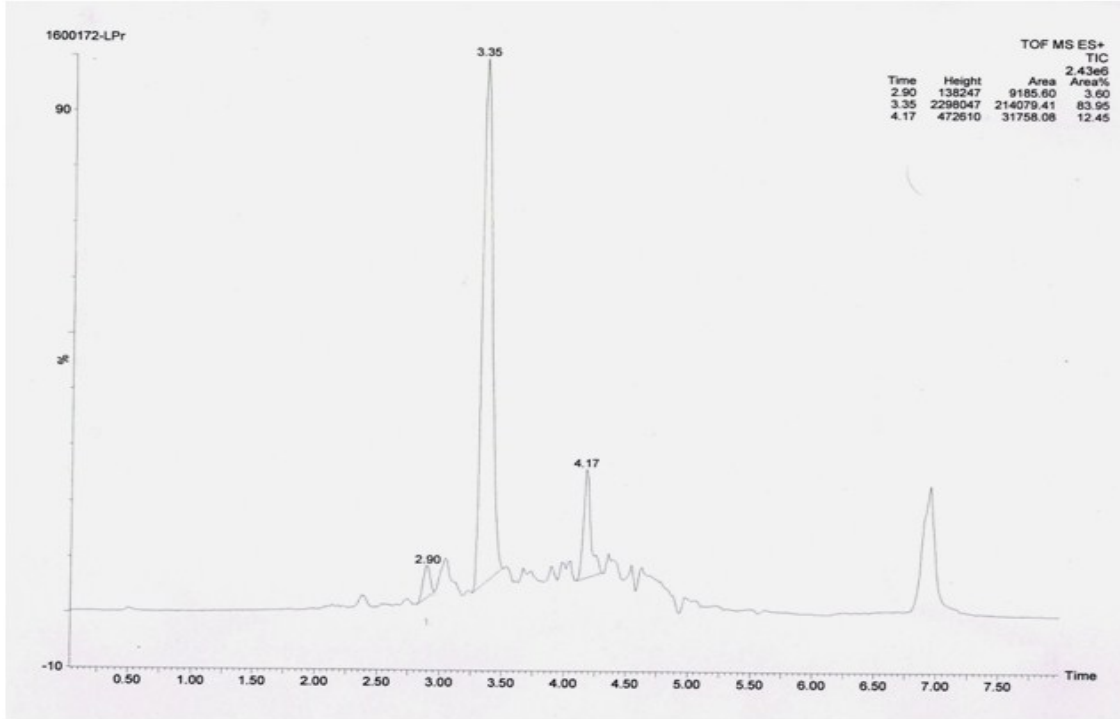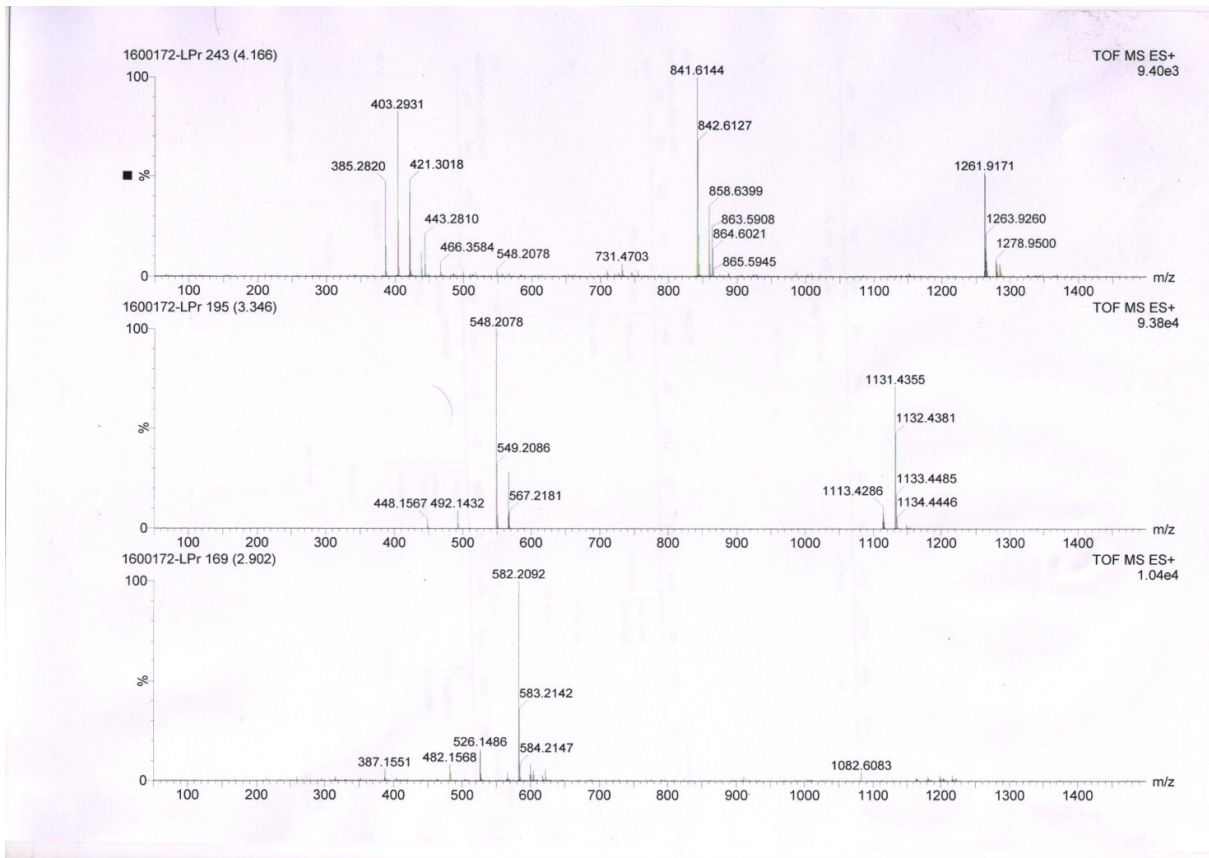

$^1\text{H}$  NMR (400 MHz,  $\text{CDCl}_3$ ) and  $^{13}\text{C}$  NMR (100 MHz,  $\text{CDCl}_3$ ) of Ligated product **4f**

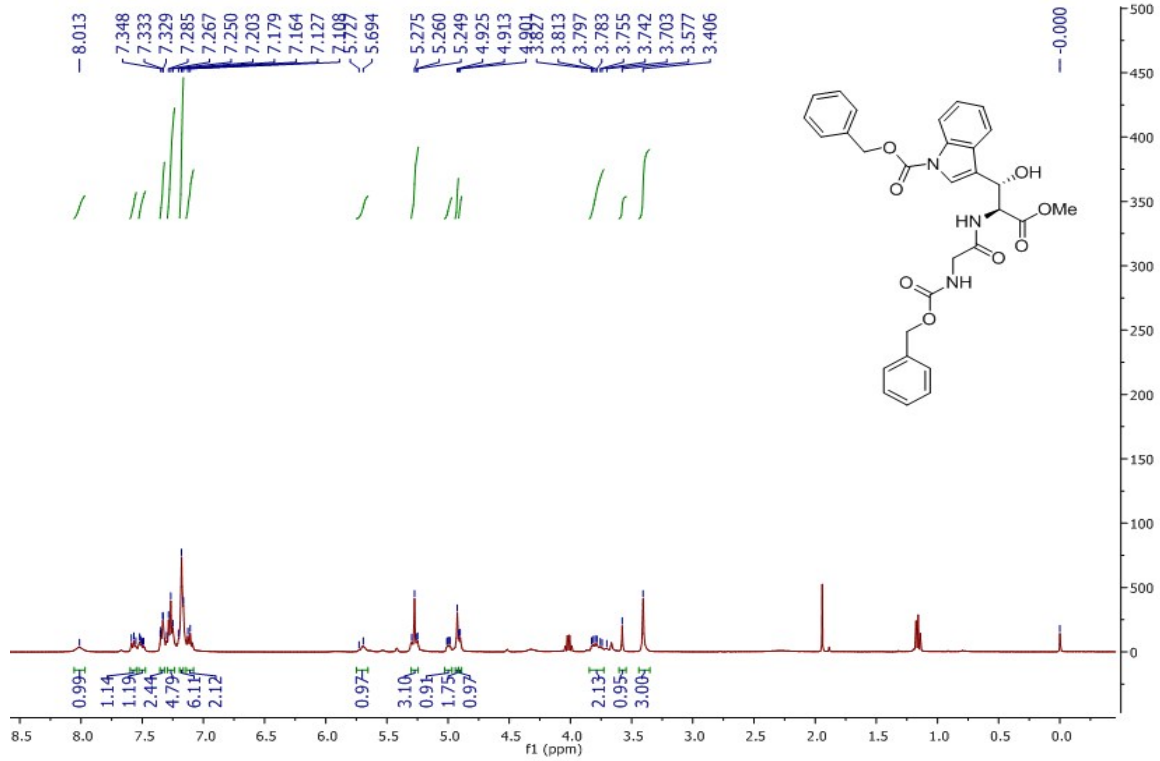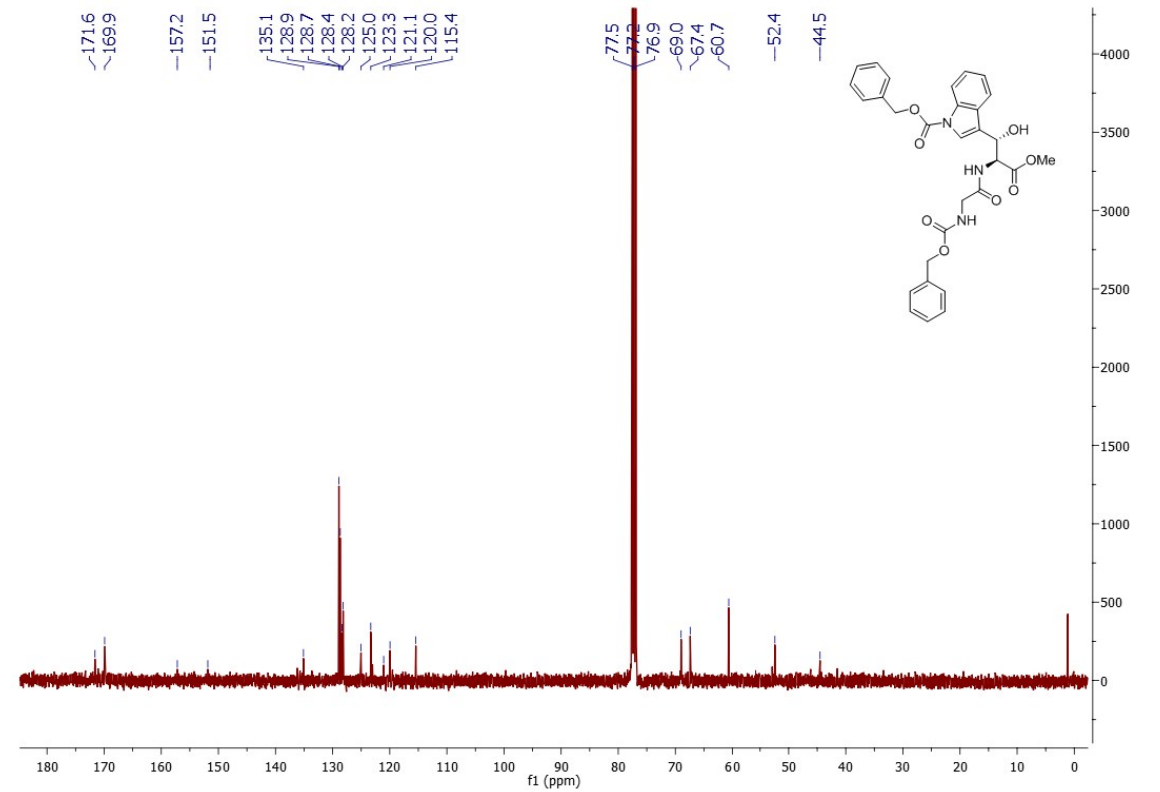



$^1\text{H}$  NMR (400 MHz,  $\text{CDCl}_3$ ) and  $^{13}\text{C}$  NMR (100 MHz,  $\text{CDCl}_3$ ) of Ligated product **4g**

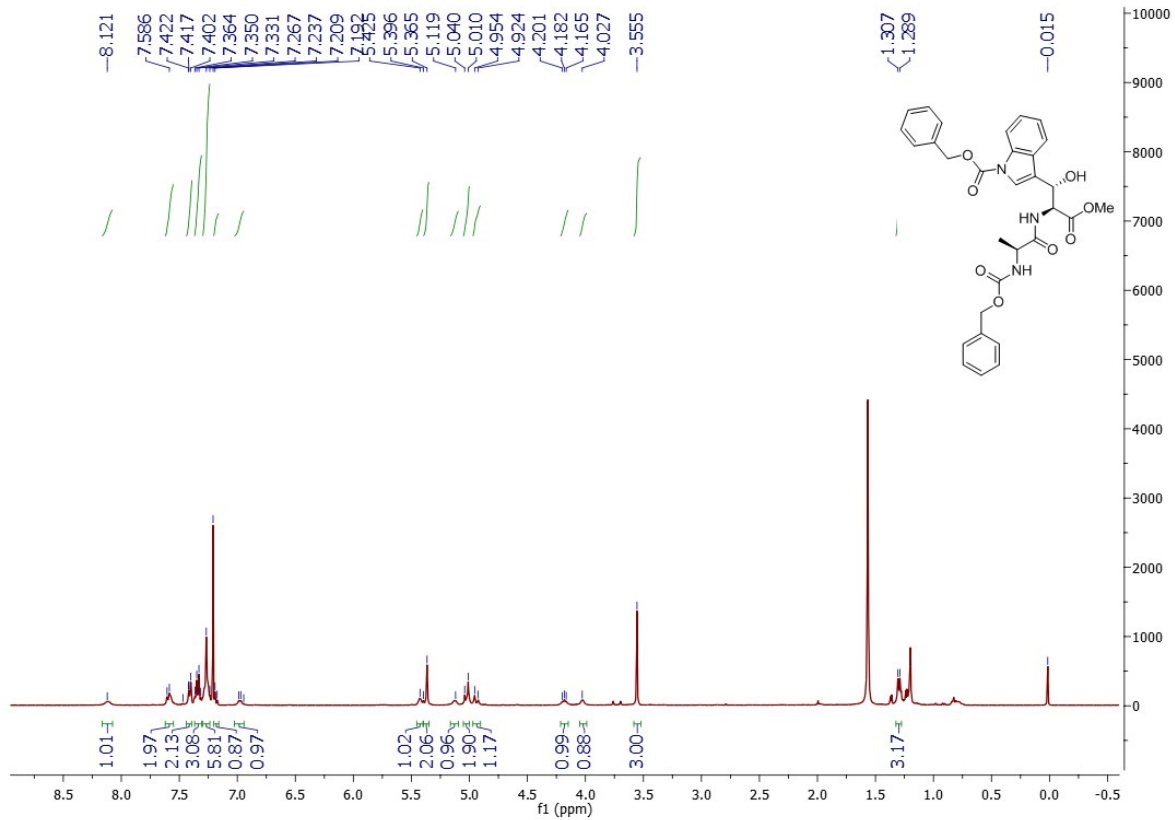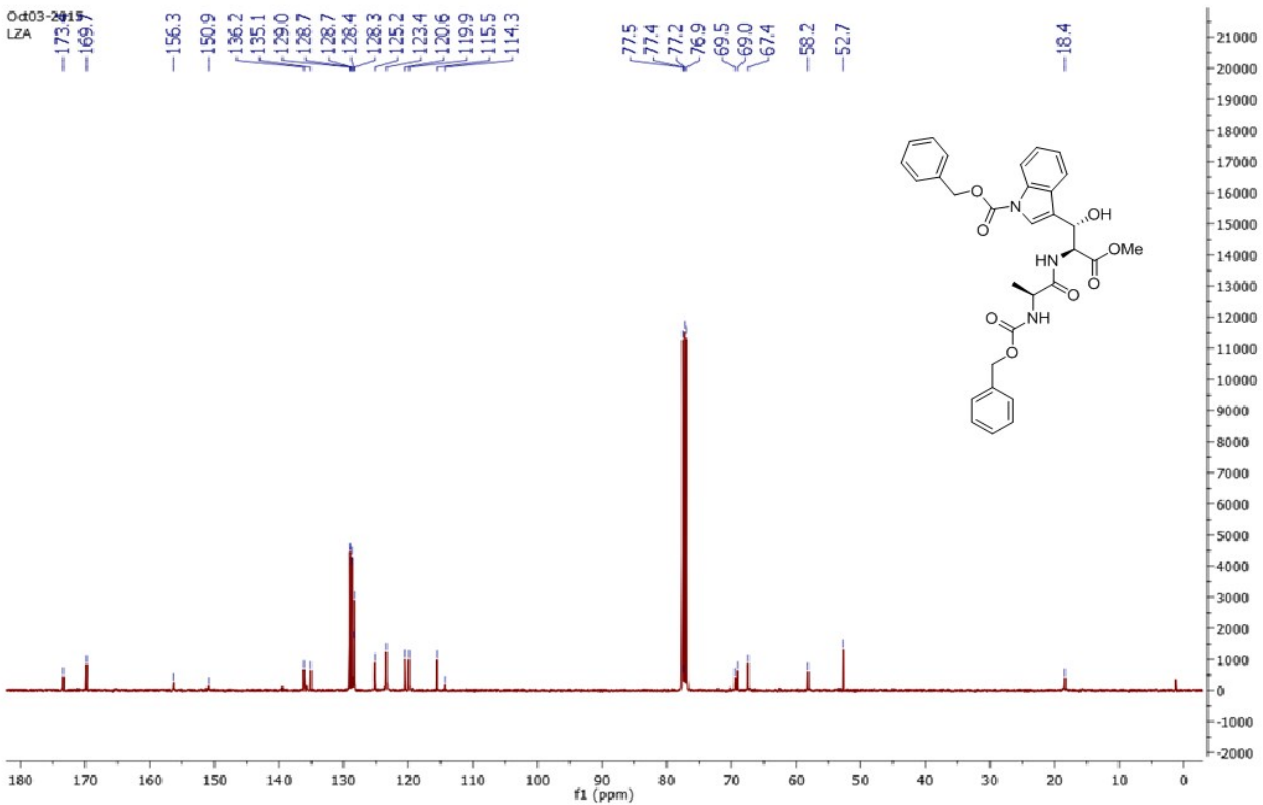

$^1\text{H}$  NMR (400 MHz,  $\text{CDCl}_3$ ) and  $^{13}\text{C}$  NMR (100 MHz,  $\text{CDCl}_3$ ) of Ligated product **4h**

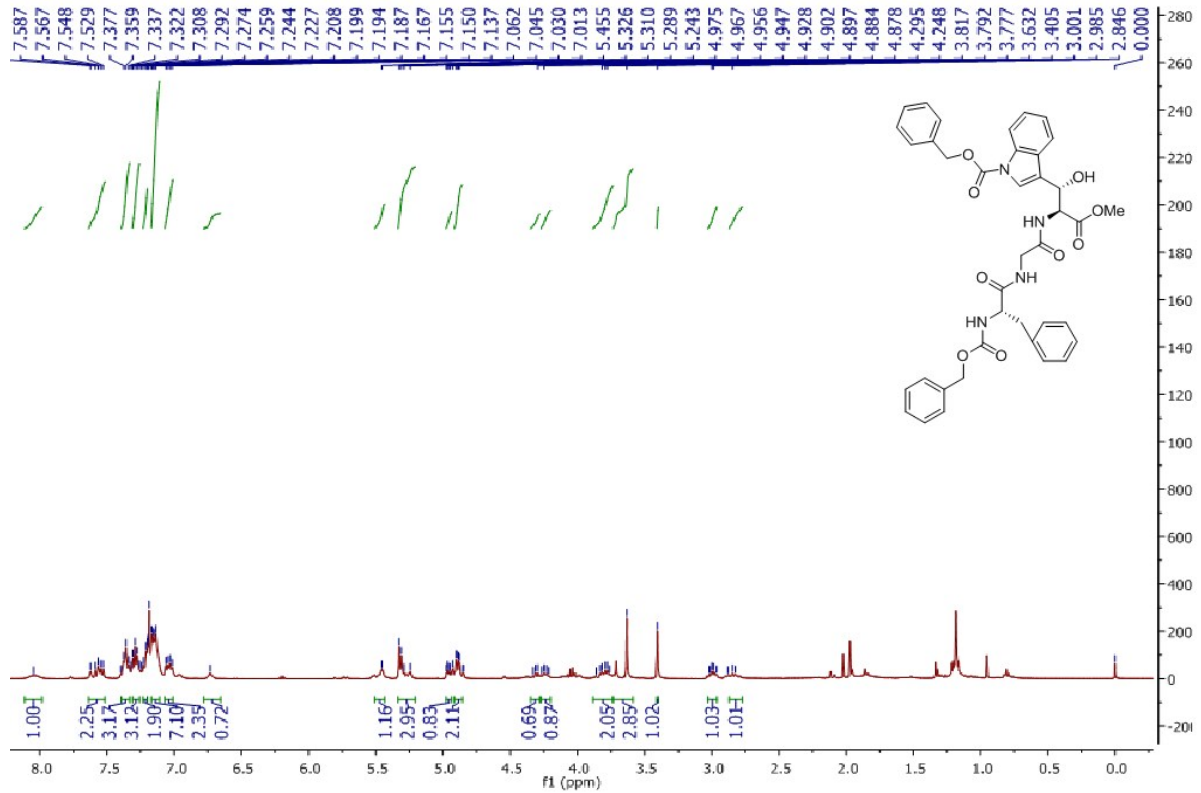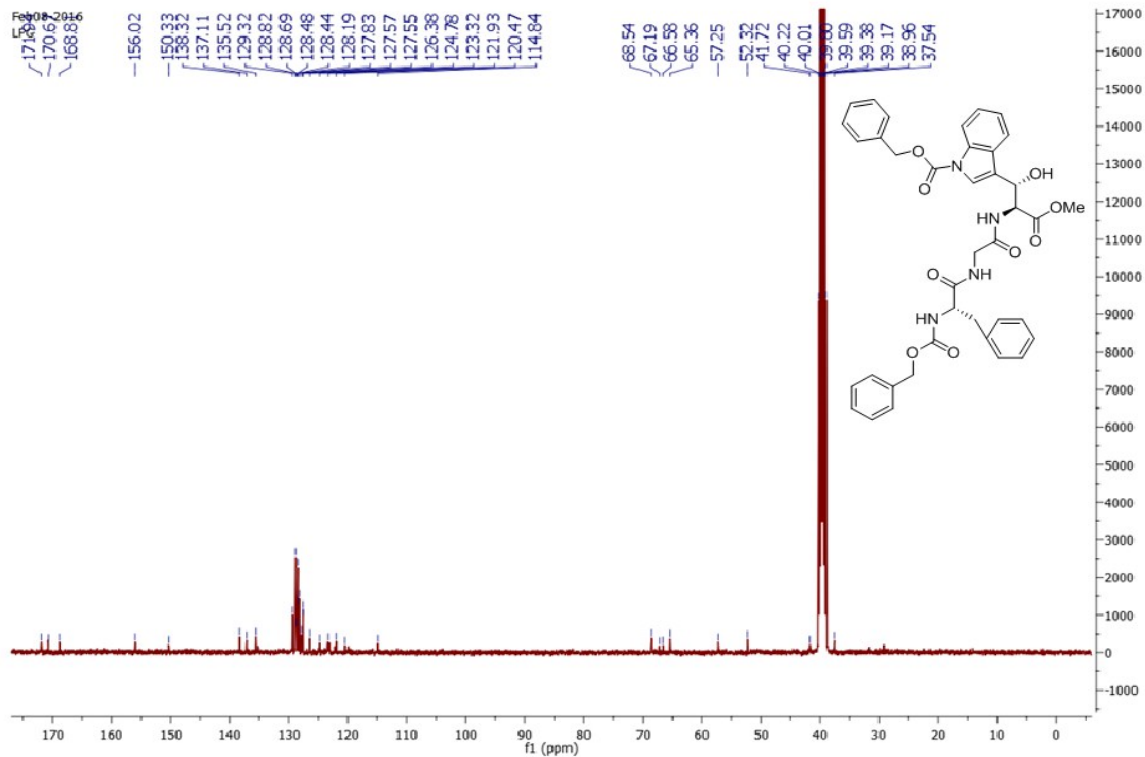

$^1\text{H}$  NMR (400 MHz,  $\text{CDCl}_3$ ) and  $^{13}\text{C}$  NMR (100 MHz,  $\text{CDCl}_3$ ) of Ligated product **4i**

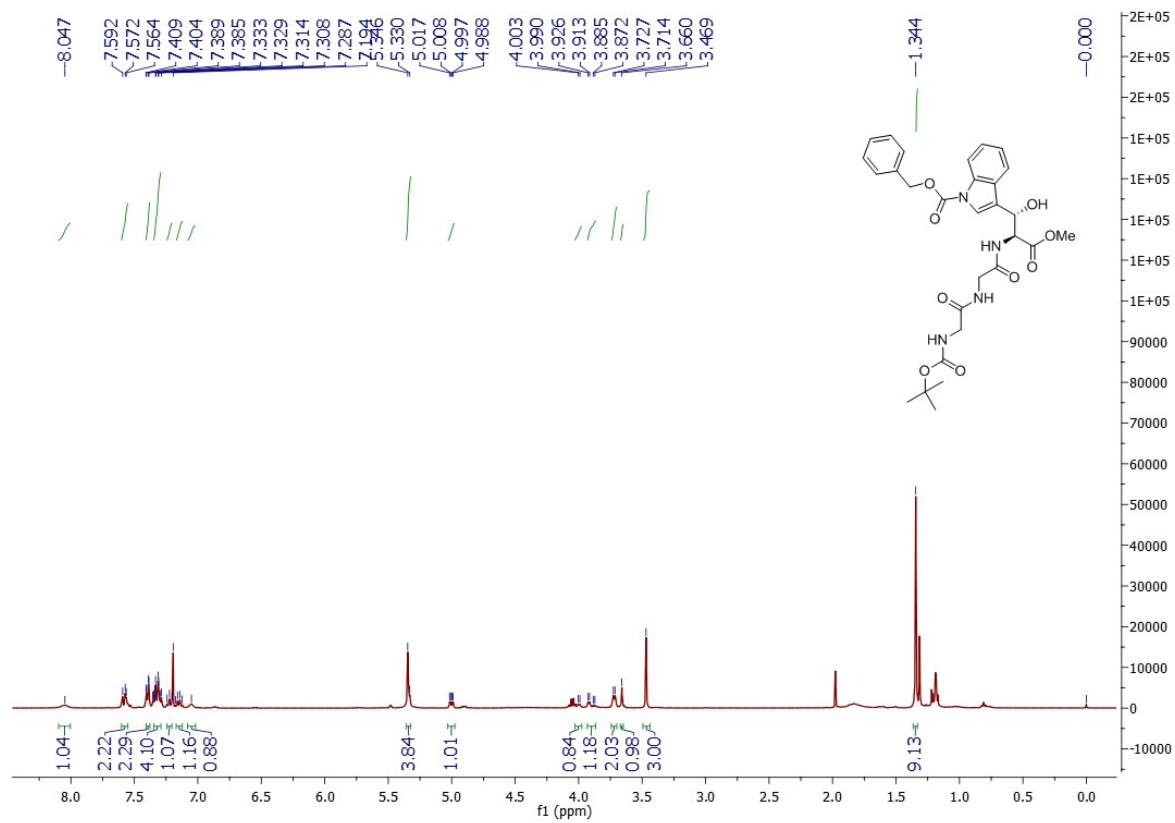

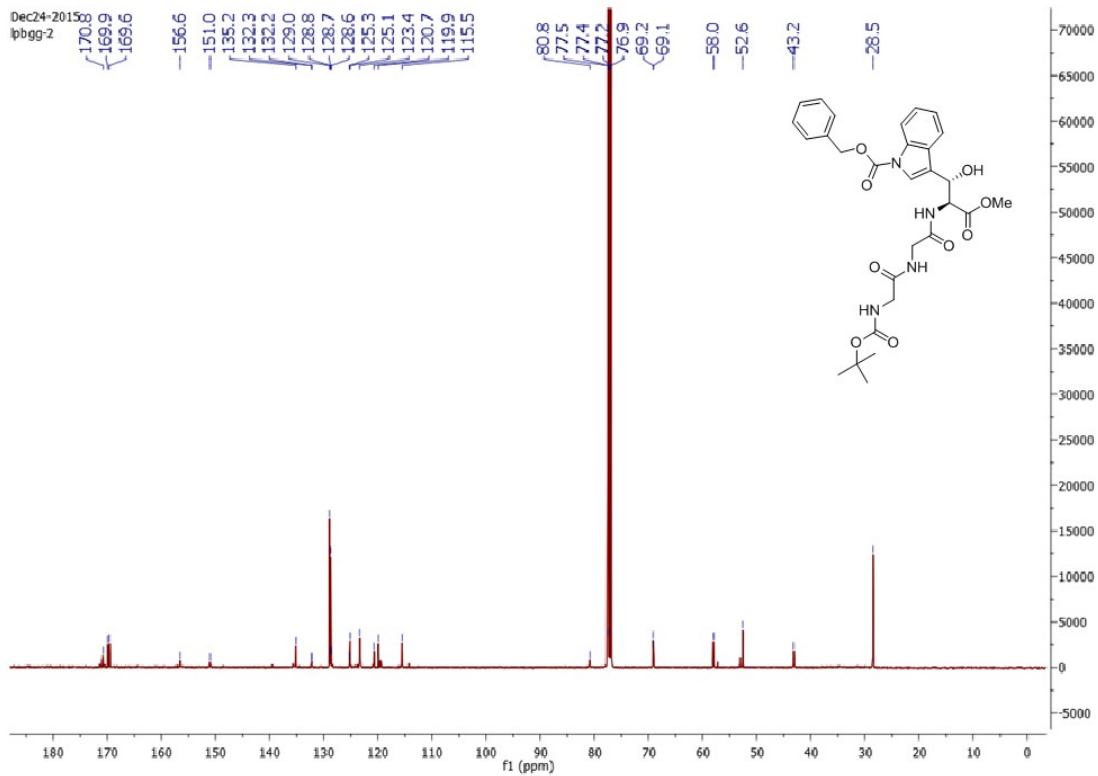

<sup>1</sup>H NMR (400 MHz, CDCl<sub>3</sub>) and <sup>13</sup>C NMR (100 MHz, CDCl<sub>3</sub>) of Ligated product **4j**

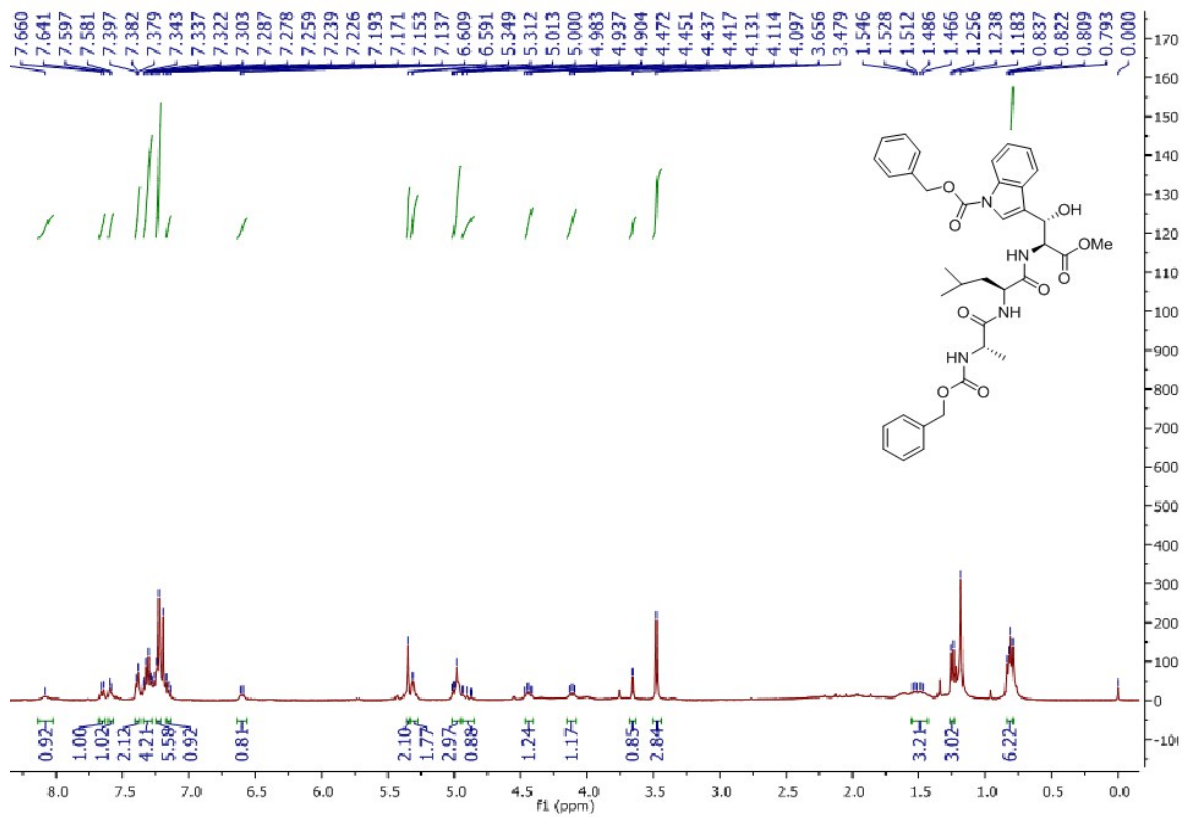

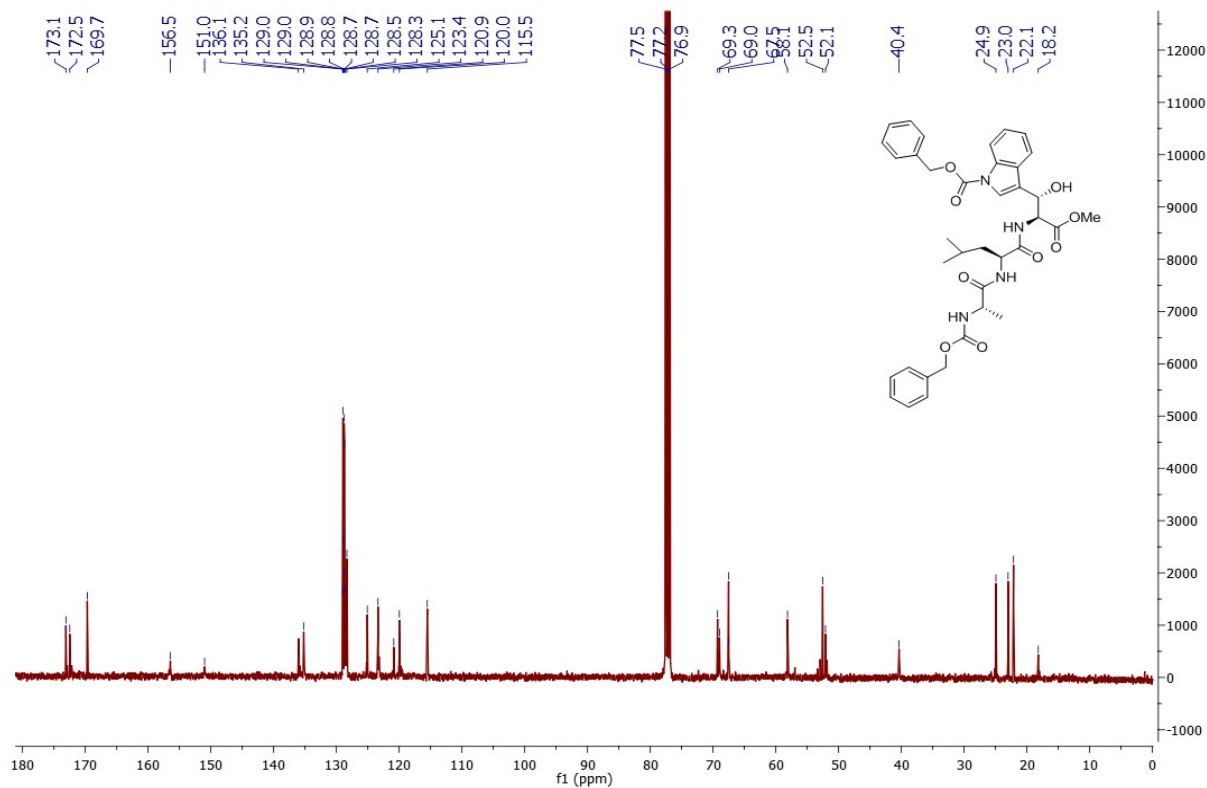

**<sup>1</sup>H NMR (400 MHz, CDCl<sub>3</sub>) and <sup>13</sup>C NMR (100 MHz, CDCl<sub>3</sub>) of Ligated product 4k**

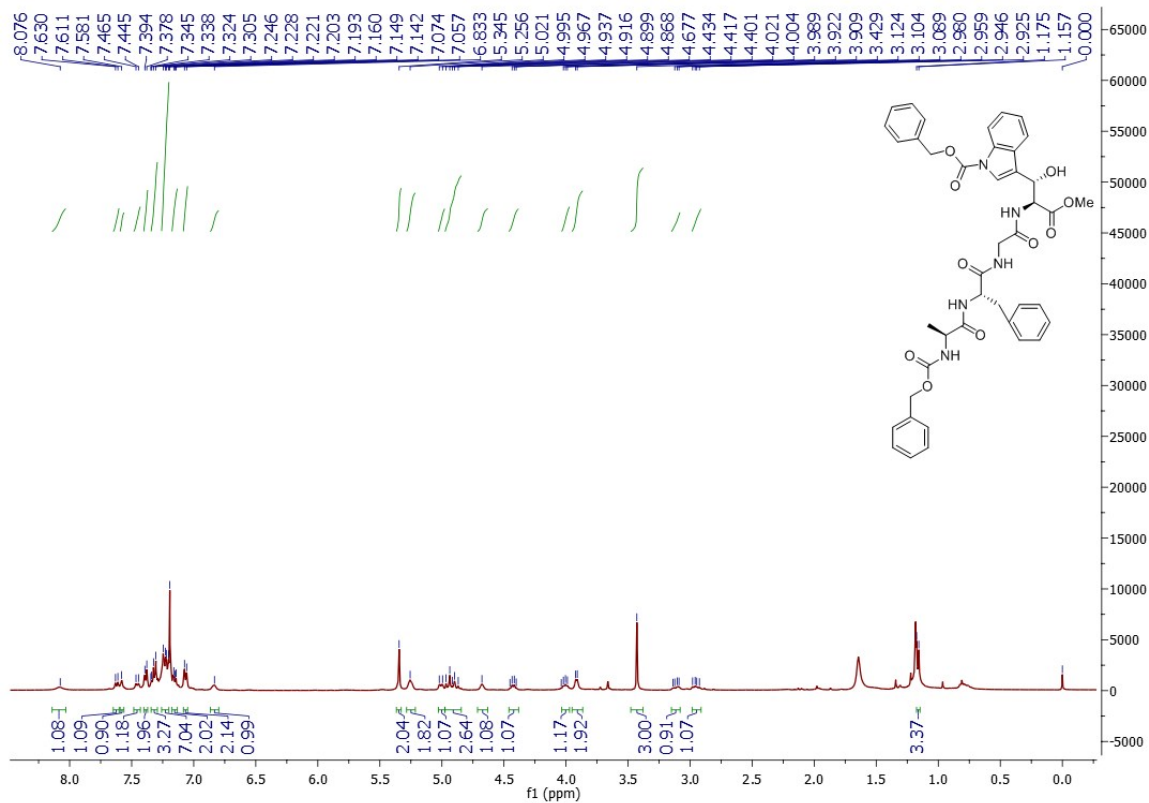

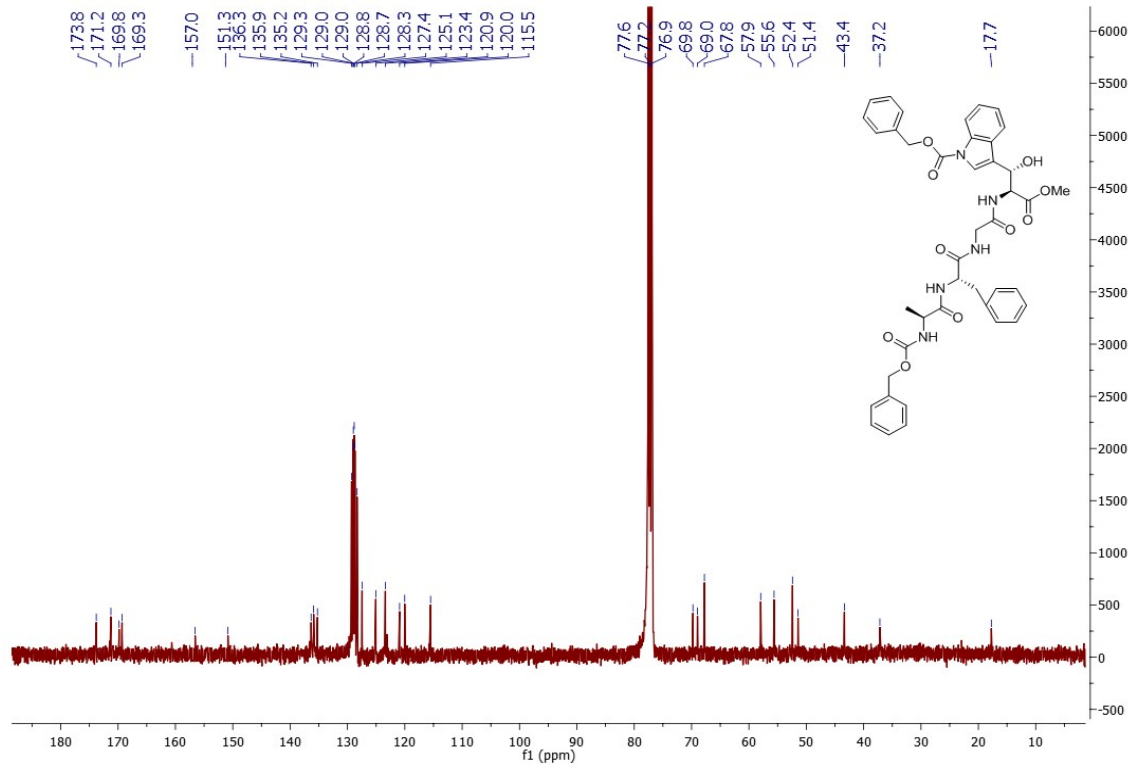

2D NMR (COSY) of precursor of ligation reaction N<sub>3</sub>-Trp(Cbz)(O-Val-Boc)-OMe **3c**

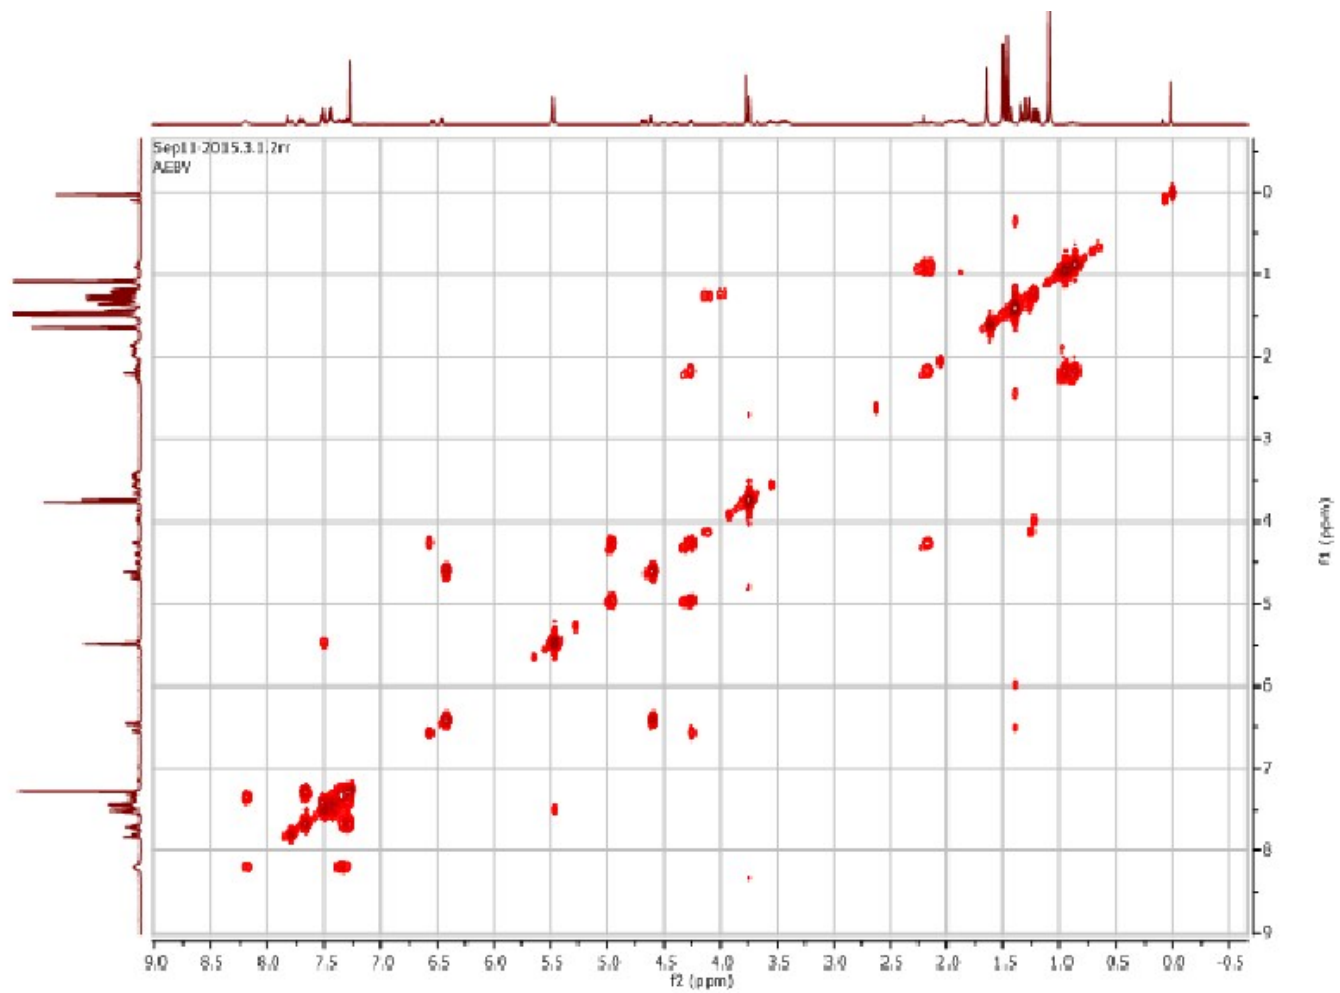

2D NMR (COSY) of Ligated peptide Boc-Val-Trp(OH)(Cbz)-OMe **4c**

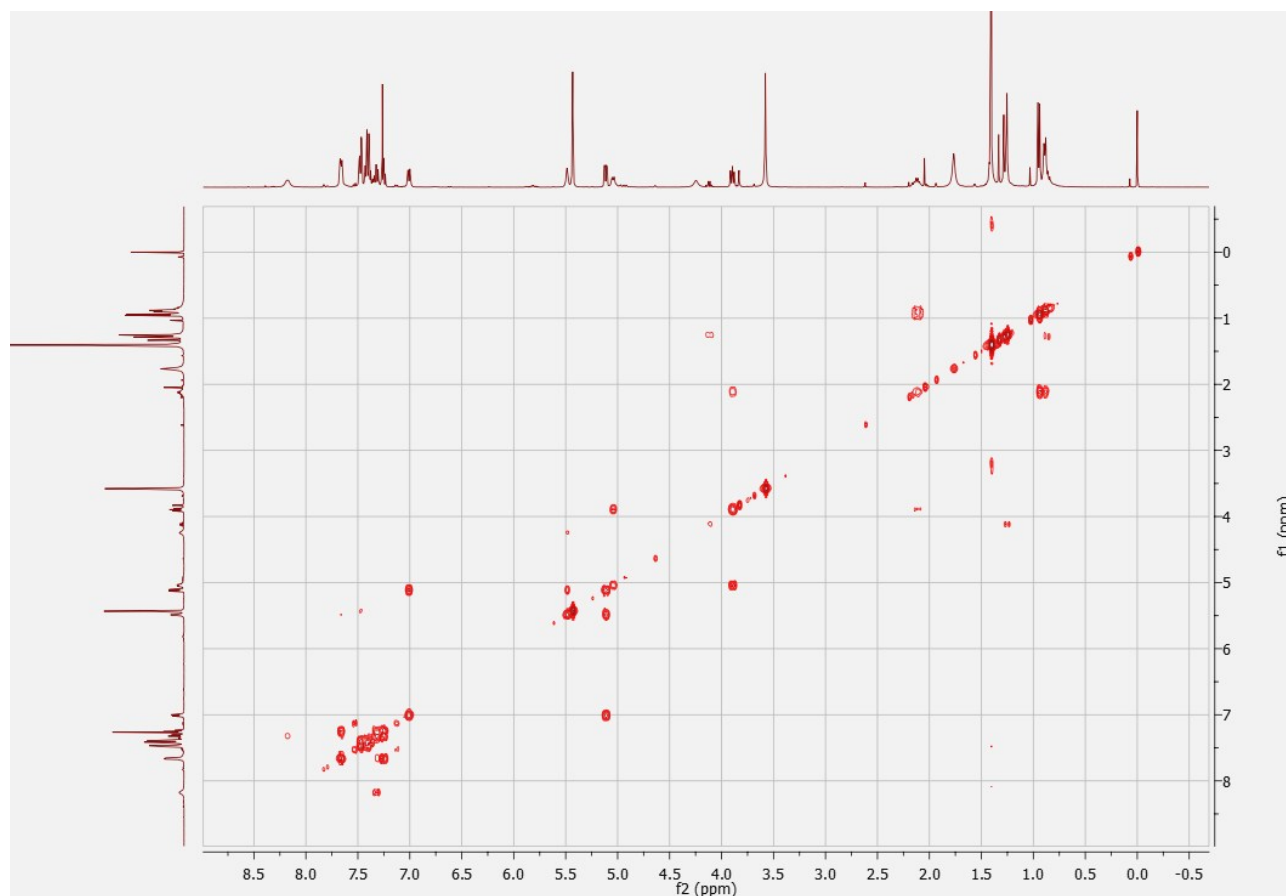

2D NMR (HMBC) of Ligated peptide Boc-Val-Trp(OH)(Cbz)-OMe **4c**



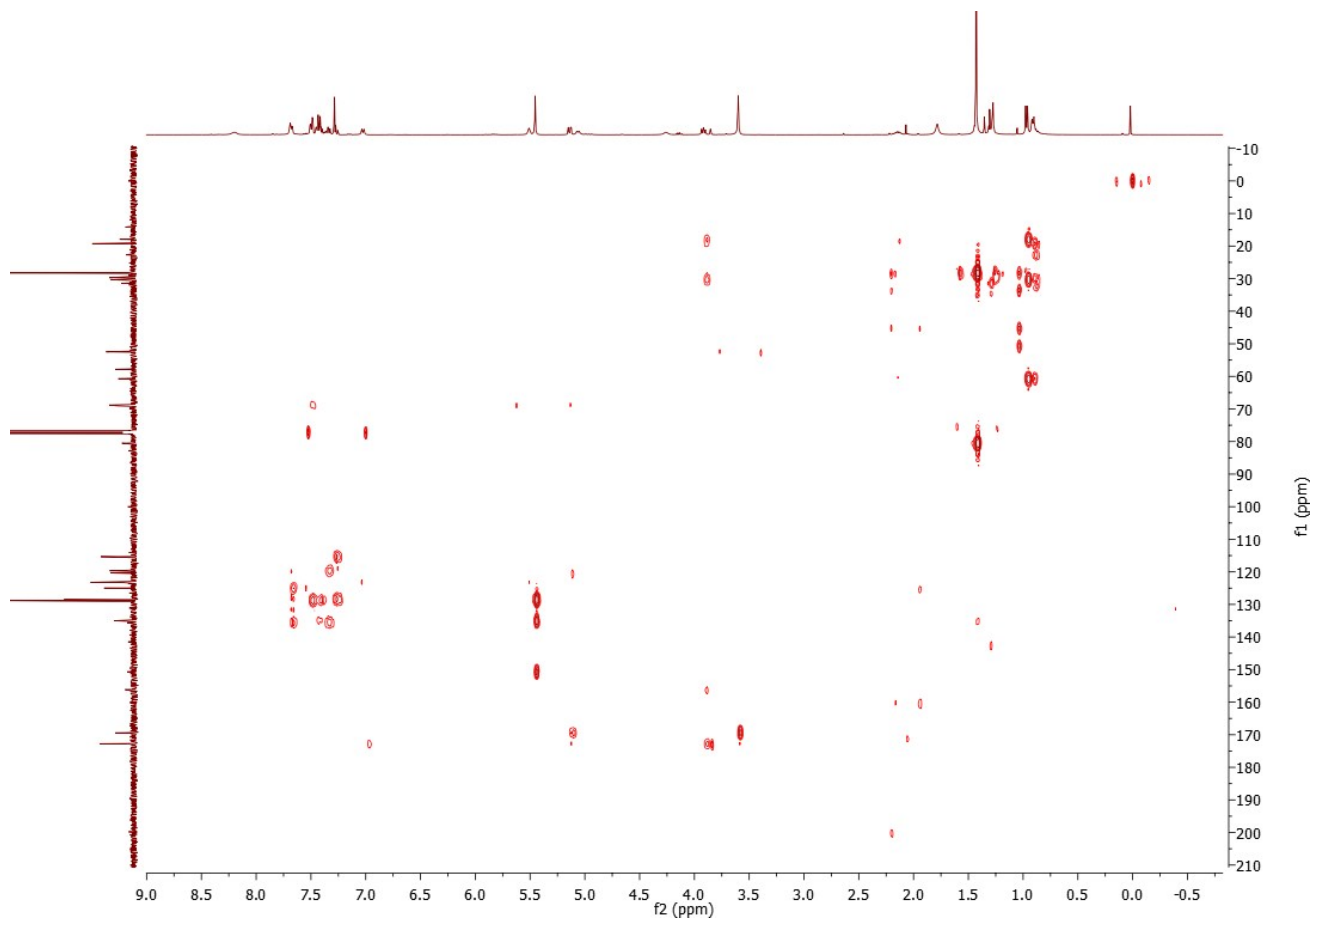

Supplement: c6ob01542e1.pdf [file c6ob01542e1.pdf]
